# Supplementary material for: PVT1 signals an androgen-dependent transcriptional repression program in prostate cancer cells and a set of the repressed genes predicts high-risk tumors
Source: PubMed Central journal article supplement (PMC7798249; doi:10.1186/s12964-020-00691-x), 2021-01-11
Supplement: 12964_2020_691_MOESM3_ESM.pdf [file 12964_2020_691_MOESM3_ESM.pdf]

***PVT1* signals an androgen-dependent transcriptional repression program in  
prostate cancer cells and a set of the repressed genes  
predicts high-risk tumors**

**Alexandre Videira<sup>1,2,#</sup>, Felipe C. Beckedorff<sup>1,2,a,#</sup>, Lucas F. daSilva<sup>1,2,a</sup>,**

**Sergio Verjovski-Almeida<sup>1,2</sup>**

<sup>1</sup>Laboratório de Expressão Gênica em Eucariotos, Instituto Butantan, 05503-900 São Paulo, SP, Brazil.

<sup>2</sup>Departamento de Bioquímica, Instituto de Química, Universidade de São Paulo, 05508-900 São Paulo, SP, Brazil

# These authors have contributed equally to this work

<sup>a</sup>**Present address:** Sylvester Comprehensive Cancer Center, University of Miami Miller School of Medicine, Miami, Florida, USA

## **Supplementary Figures and Tables**

Supplementary Figures S1 to S6 are given below, on pages 2 to 8.

Supplementary Table S1 is on pages 9-10, Supplementary Table S2 is on pages 11-16, Supplementary Table S3 is on pages 17-20, Supplementary Table S4 is on pages 21-23, and Supplementary Table S5 is on page 24.

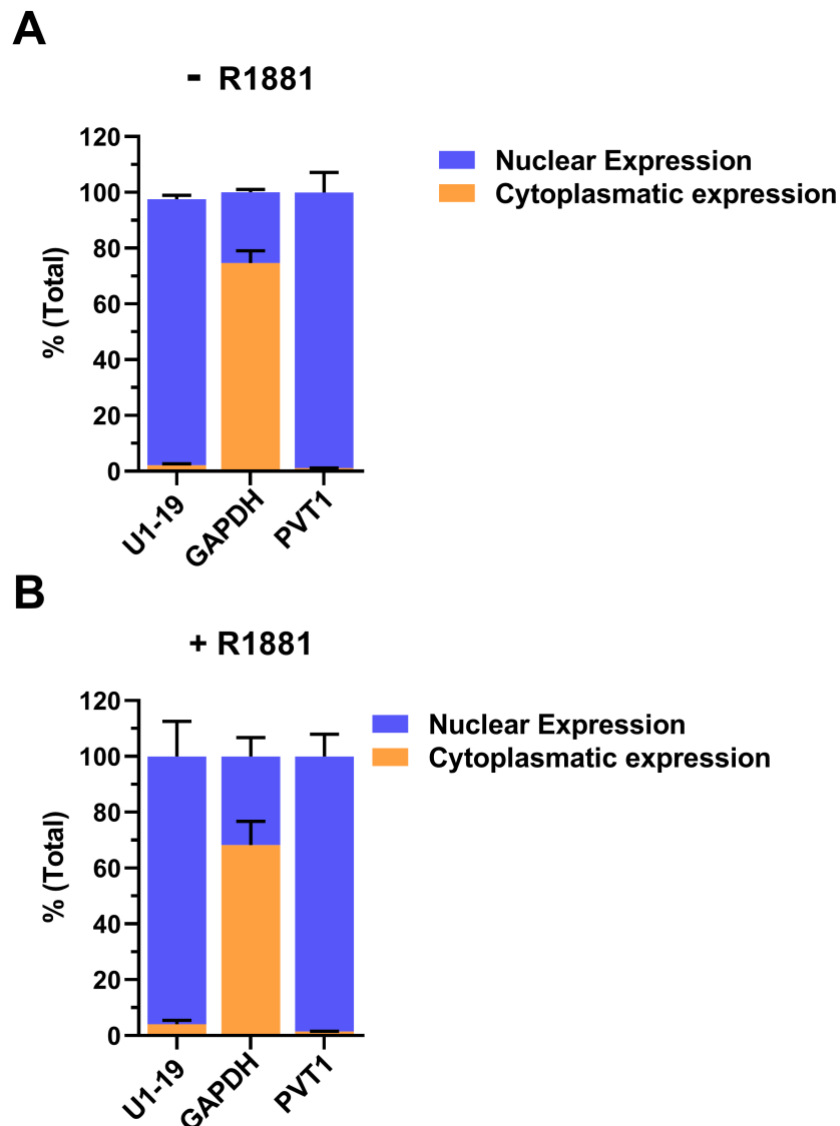

**Supplementary Fig. S1. Subcellular localization of *PVT1* lincRNA in LNCaP cells.** LNCaP cells in culture (A) with no androgen (– R1881), or (B) with 10 nM R1881 (+ R1881) were processed for subcellular fractionation by differential centrifugation. After nuclear and cytosolic fractions separation, RNA was extracted and the expression levels of *PVT1* in the fractions was measured by Real-time RT-qPCR. *GAPDH* was used as a cytosolic marker, and *snRNA U1-19* was used as a nuclear marker. For each gene, the % of total expression detected in each compartment is shown. Three biological replicates of each condition, with three technical replicates of qPCR per sample were assayed. Mean  $\pm$  S.D. is shown.

A

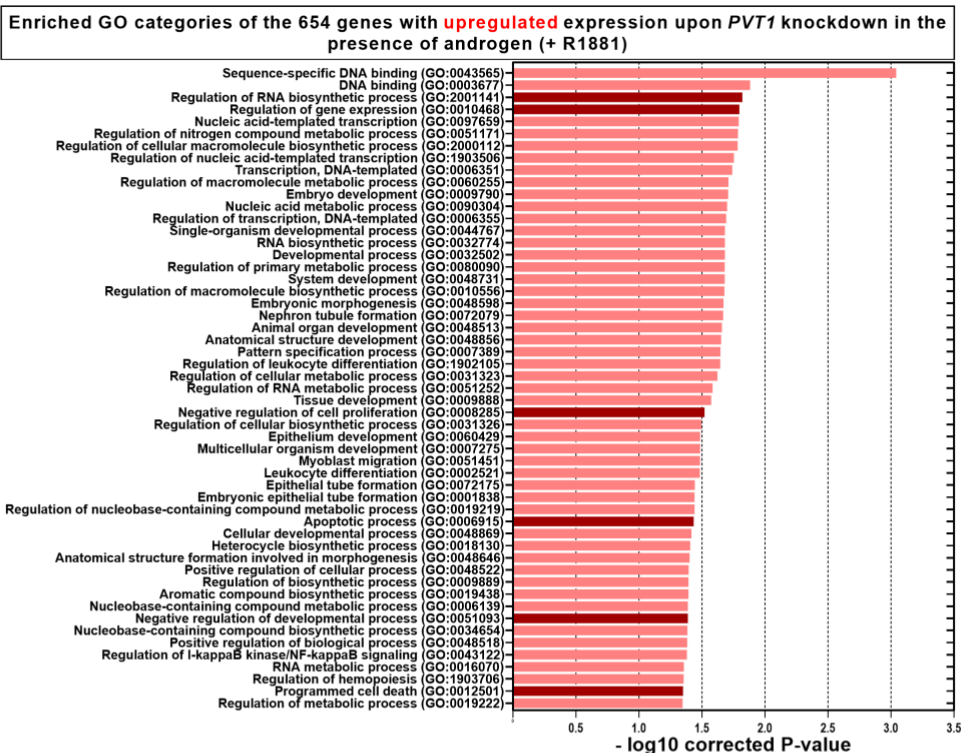

B

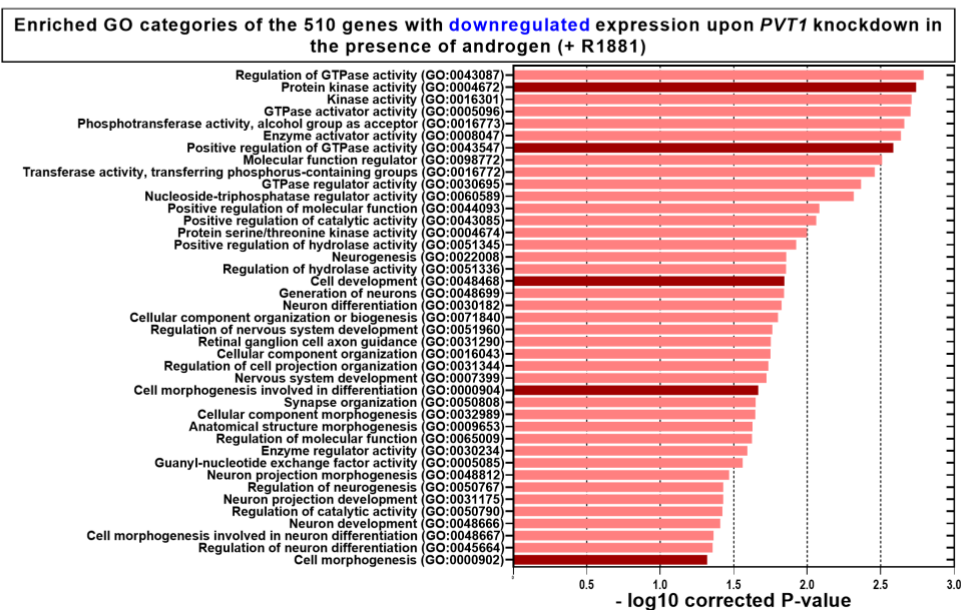

Supplementary Fig. S2. Gene Ontology (GO) terms significantly enriched among the genes whose expression was affected by *PVT1* knockdown in androgen treated LNCaP cells. Benjamini-Hochberg corrected P-values are shown on the x-axis.

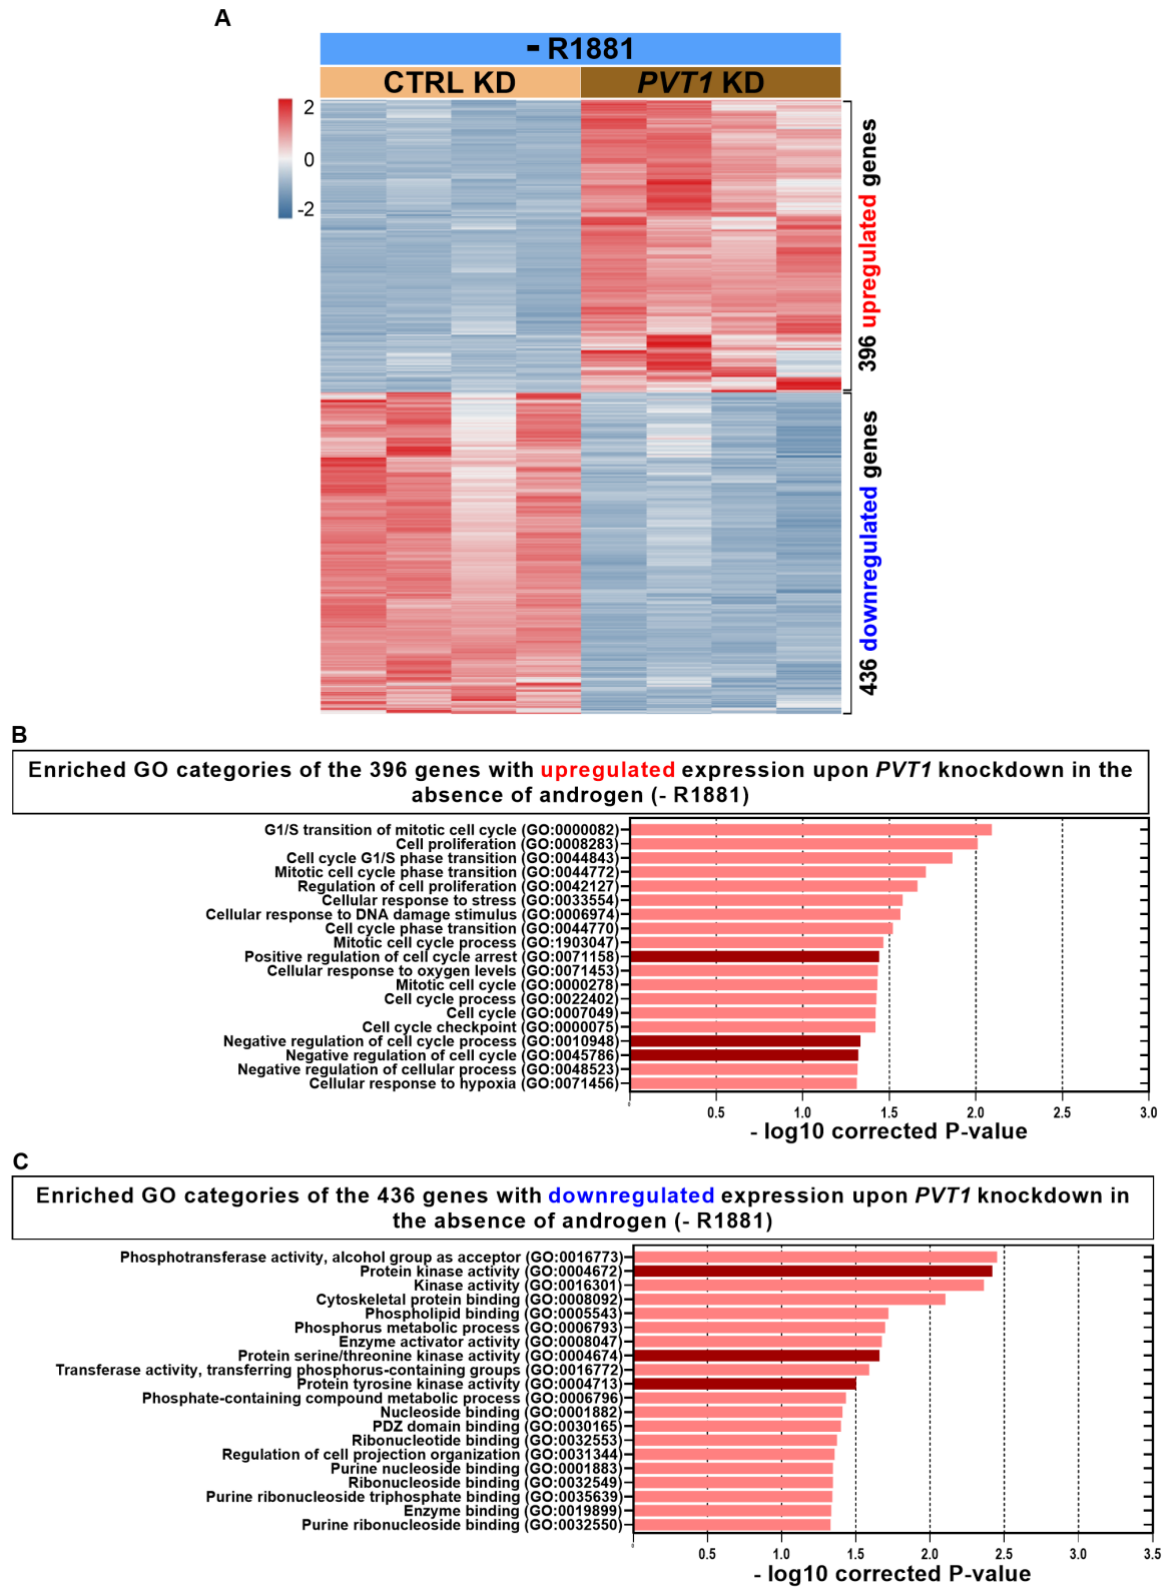

Supplementary Fig. S3. *PVT1* knockdown affects the expression of hundreds of genes in hormone-starved LNCaP cells. LNCaP cells were starved of androgen for 48 h (-R1881), then a pool

of antisense LNA GapmeR oligos targeting *PVT1* (*PVT1* KD) or a scrambled GapmeR oligo (CTRL KD) were added, cells were incubated for 24 h, followed by addition of control vehicle (ethanol) and incubation for another 24 h. RNA was extracted from four biological replicates of each condition, purified and used for gene expression measurements. **A**, detection with microarrays of genome-wide gene expression changes induced by *PVT1* knockdown (one replicate in each column, one gene in each line; z-core color scale on the left) (q-value<0.01, fold-change<0.5 or fold-change>2). **B and C**, Gene Ontology (GO) terms significantly enriched among the genes whose expression was affected by *PVT1* knockdown in hormone-starved LNCaP cells. Benjamini-Hochberg corrected P-values are shown on the x-axis. GO terms mentioned in the main text are shown with a darker red color bar.

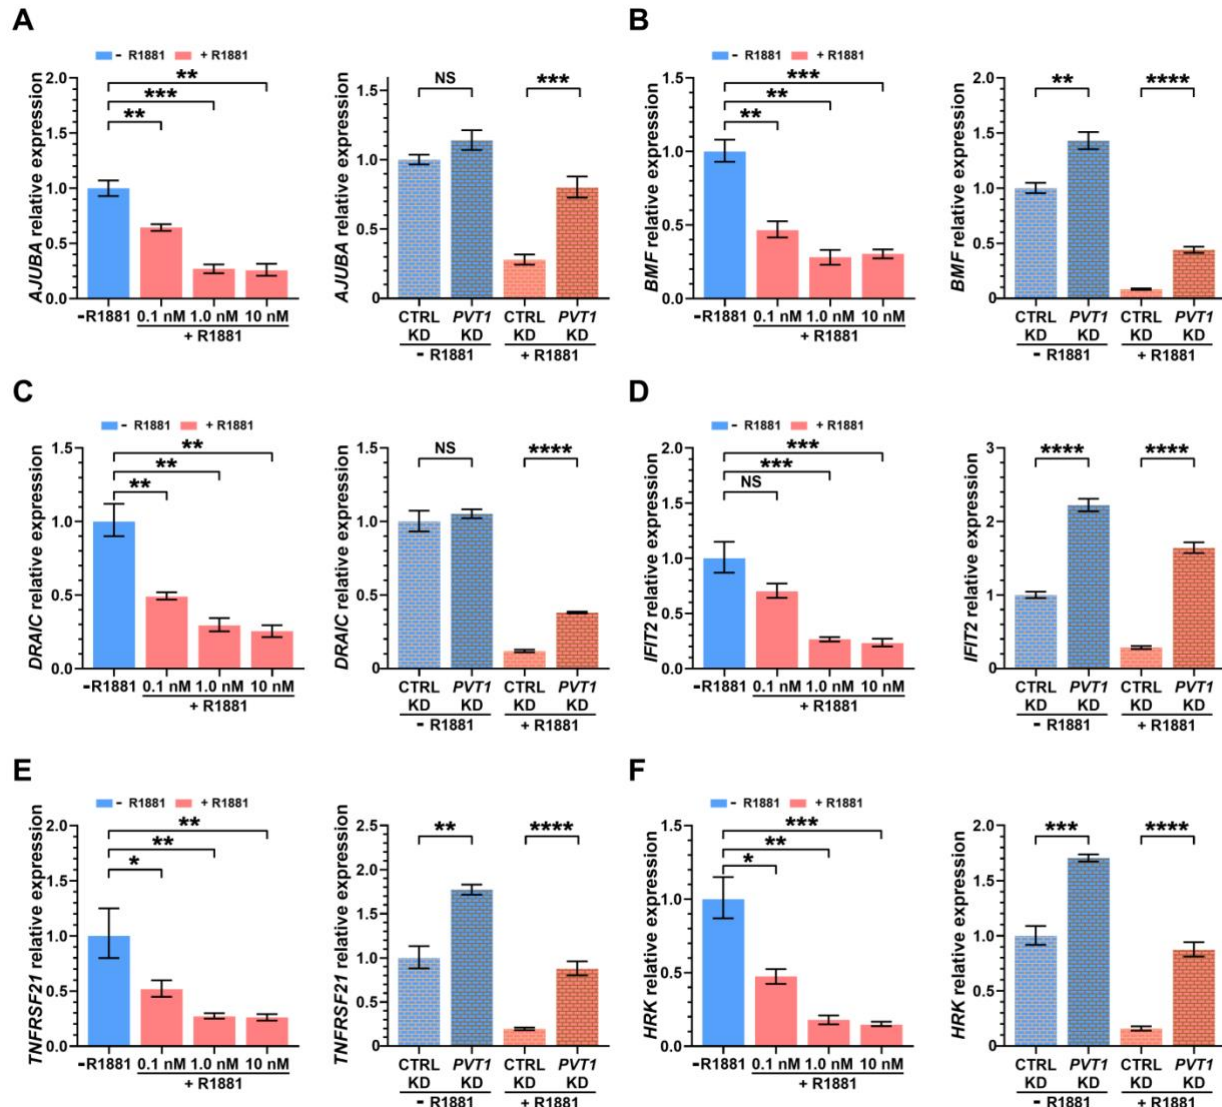

**Supplementary Fig. S4. Validation by RT-qPCR of genes that were repressed by androgen and de-repressed by *PVT1* knockdown.** A to F, RT-qPCR relative expression measurements of six selected tumor suppressor target genes, whose names are indicated in the Y-axis. In LNCaP cells, gene expression was repressed by androgen (+R1881) in a dose-dependent manner in the presence of endogenous *PVT1* (left part of each set from A to F), and *PVT1* knockdown (*PVT1* KD, -R1881, blue bars) or in androgen-treated cells (*PVT1* KD, +R1881, red bars). T-test, \* $P < 0.05$ , \*\* $P < 0.01$ , \*\*\* $P < 0.005$ , \*\*\*\* $P < 0.001$ ; mean  $\pm$  s.e.m., three biological replicates for androgen dose-dependence assays, and four biological replicates for *PVT1* knockdown assays.

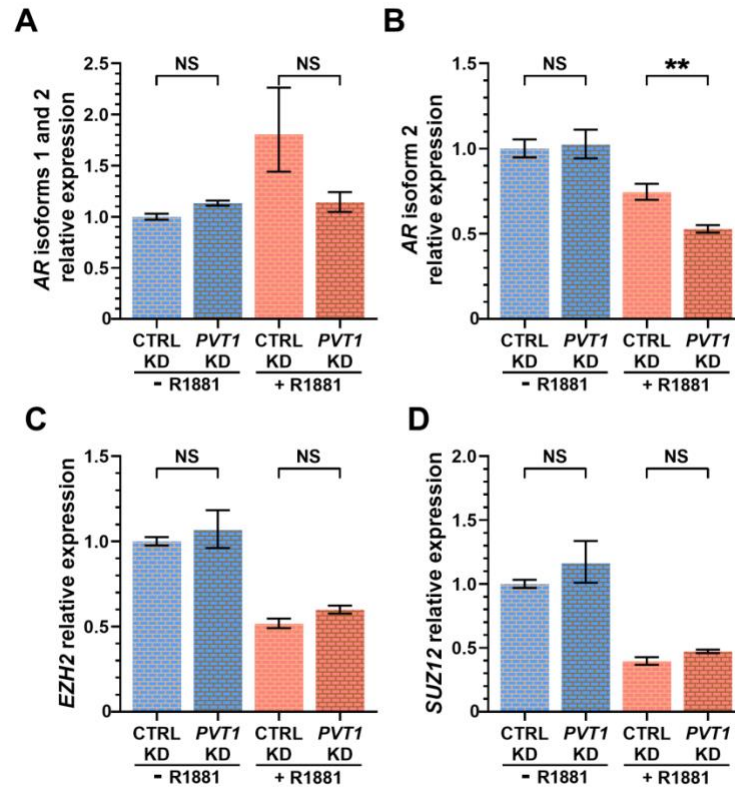

**Supplementary Fig. S5. Expression level of the *AR*, *EZH2* and *SUZ12* genes in LNCaP cells submitted to *PVT1* knockdown.** Expression levels were measured by RT-qPCR. **A**, *AR* isoforms 1 and 2 simultaneously measured. **B**, *AR* isoform 2. **C**, *EZH2*. **D**, *SUZ12*. LNCaP cells were submitted to *PVT1* knockdown (*PVT1* KD) or to control knockdown with a scrambled oligo (CTRL KD) in hormone-starved cells (-R1881, blue bars) or in androgen-treated cells (+R1881, red bars). Relative expression is shown in relation to the expression in hormone-starved cells with control knockdown. T-test, \*\* $P < 0.01$ ; mean  $\pm$  s.e.m., four biological replicates.

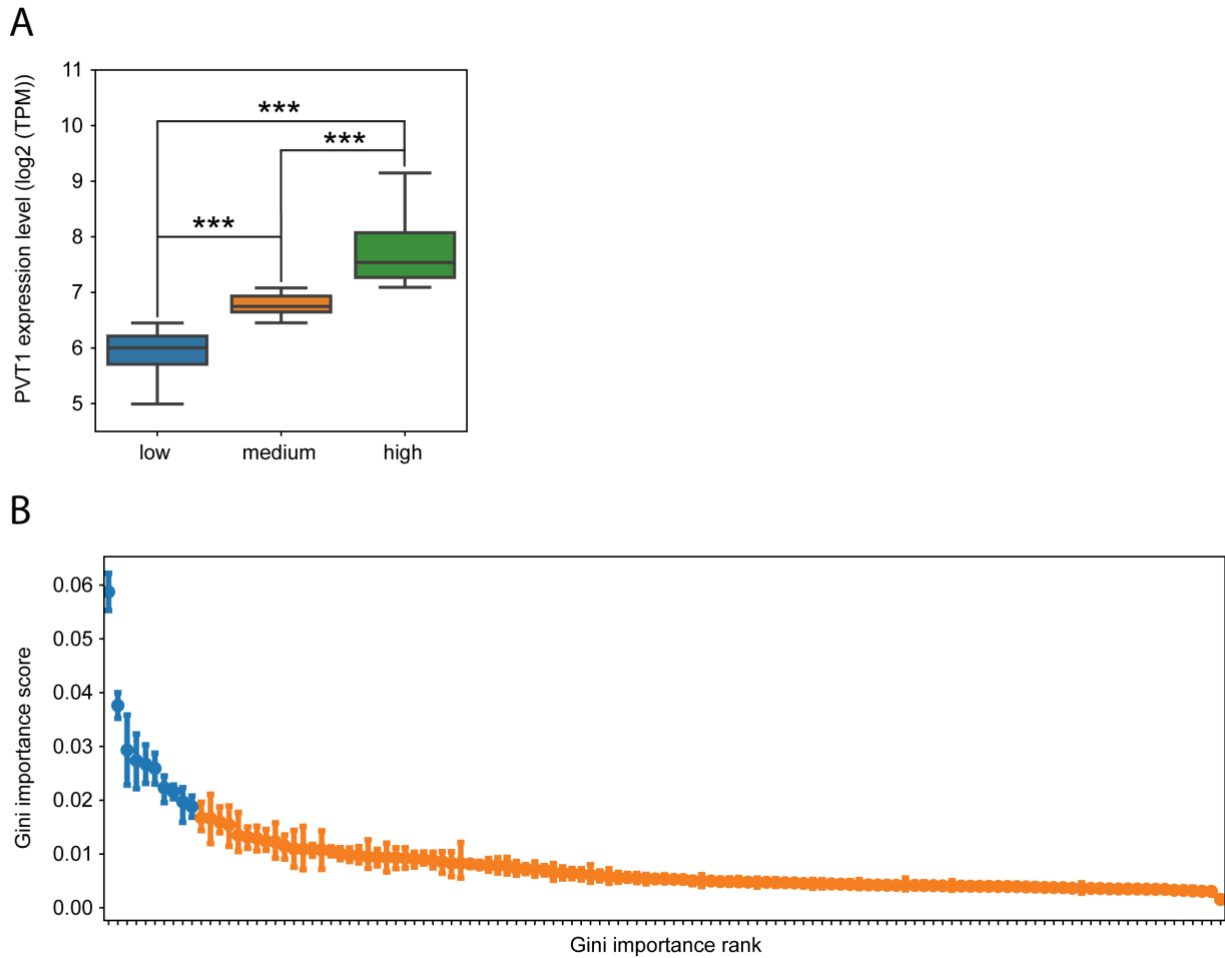

**Supplementary Fig. S6. *PVT1* expression level in the TCGA-PRAD samples and Gini importance score of all genes from the 121-gene-set used in the machine-learning model for tumor-risk classification.** **A**, Boxplot showing the *PVT1* expression levels in the tumors of 499 TCGA-PRAD patients divided into 3-quantile groups comprised of low-*PVT1* samples (blue), medium-*PVT1* (orange) and high-*PVT1* samples (green). Significance was calculated using a two-tail t-test, \*\*\* $P < 0.001$ . **B**, Gini importance score for each of the 121 genes that were upregulated after *PVT1* depletion in LNCaP cells, calculated by the Random Forest machine-learning algorithm in the TCGA-PRAD tumor-risk classification analysis. Blue points and error bars represent the Gini score mean  $\pm$  s.d. (calculated from the 5-cross-validation step) for the top 10 genes with the highest Gini importance score, and orange points and error bars represent the remaining genes.



**Supplementary Table S1. Oligonucleotides used in this work**

| Target gene                                                                                                                                                                                                   | Name of oligonucleotide           | Sequence 5' - 3'                      |
|---------------------------------------------------------------------------------------------------------------------------------------------------------------------------------------------------------------|-----------------------------------|---------------------------------------|
| <b>Assay: PVT1 knockdown</b>                                                                                                                                                                                  |                                   |                                       |
| <i>PVT1</i>                                                                                                                                                                                                   | PVT1_2<br>(Exiqon LG00177218-DDA) | +A*+G*+T*G*T*C*C*T*G*G*C*A*G*+T*+A*+A |
| <i>PVT1</i>                                                                                                                                                                                                   | PVT1_5<br>(Exiqon LG00177218-DDA) | +A*+T*+C*G*T*A*A*T*G*G*G*T*T*+G*+A*+A |
| Scrambled negative control                                                                                                                                                                                    | Exiqon LG00000002                 |                                       |
| In the above sequences, the asterisk indicates a phosphorothioate linkage in the backbone of the oligonucleotide, and the "+" signal indicates a locked nucleic acid (LNA) in place of the common nucleotide. |                                   |                                       |
| <b>Assay: RT-qPCR</b>                                                                                                                                                                                         |                                   |                                       |
| <i>ACTB</i>                                                                                                                                                                                                   | actb_forward                      | CTTCCTTCCTGGGCATGG                    |
|                                                                                                                                                                                                               | actb_reverse                      | AGACAGCACTGTGTTGGCGTA                 |
| <i>AJUBA</i>                                                                                                                                                                                                  | ajuba_forward                     | GGACCGGGATTATCACTTTGAG                |
|                                                                                                                                                                                                               | ajuba_reverse                     | CAACCATGGCAGAGCAAGTG                  |
| <i>AR</i>                                                                                                                                                                                                     | ar_iso1_forward                   | TCAAGGGAGGTTACACCAAAGG                |
|                                                                                                                                                                                                               | ar_iso1_reverse                   | GAGACAGGGTAGACGGCAGTTC                |
|                                                                                                                                                                                                               | ar_iso2_forward                   | GCACCTTATGTCCTCCCTTCAG                |
|                                                                                                                                                                                                               | ar_iso2_reverse                   | CTGTGAACATGCCCAAAGAAG                 |
| <i>BMF</i>                                                                                                                                                                                                    | bmf_forward                       | TACTCAAGCGGGACCTTCTTTC                |
|                                                                                                                                                                                                               | bmf_reverse                       | TCACCATCACAGACACATCAGC                |
| <i>DRAIC</i>                                                                                                                                                                                                  | draic_forward                     | TGAACTCAACTCCTGAGAAGGAC               |
|                                                                                                                                                                                                               | draic_reverse                     | CGCTCTCAGACTCTTCAGTTCTCC              |
| <i>EZH2</i>                                                                                                                                                                                                   | ezh2_forward                      | AGTGATAGGGAAGCAGGGACTG                |
|                                                                                                                                                                                                               | ezh2_reverse                      | GGAGGTTCAATATTTGGCTTCATC              |
| <i>FAS</i>                                                                                                                                                                                                    | fas_forward                       | AAGGCTTTGTTTCGAAAGAATGG               |
|                                                                                                                                                                                                               | fas_reverse                       | GATGCCAATTACGAAGCAGTTG                |
| <i>FASN</i>                                                                                                                                                                                                   | fasn_forward                      | AGGATCACAGGGACAACCTG                  |
|                                                                                                                                                                                                               | fasn_reverse                      | ACTCCACAGGTGGGAACAAG                  |
| <i>GAPDH</i>                                                                                                                                                                                                  | gapdh_forward                     | CTCTCTGCTCCTCCTGTTCTGA                |
|                                                                                                                                                                                                               | gapdh_reverse                     | ACGACCAAATCCGTTGACTCC                 |
| <i>HRK</i>                                                                                                                                                                                                    | hrk_forward                       | GCACTTCGAGAAGGAAGTGGAG                |
|                                                                                                                                                                                                               | hrk_reverse                       | TCTGTTTCTGCAGCTGGATTTC                |
| <i>IFIT2</i>                                                                                                                                                                                                  | ifit2_forward                     | CGGTAAAGTGTGGAGGAAACC                 |
|                                                                                                                                                                                                               | ifit2_reverse                     | CAGTTGTCCAGACGGTAGCTTG                |
| <i>NDRG1</i>                                                                                                                                                                                                  | ndrg1_forward                     | ACCTGCTACAACCCCTCTT                   |
|                                                                                                                                                                                                               | ndrg1_reverse                     | TGATCCATGGAGGGGTACAT                  |
| <i>NOV</i>                                                                                                                                                                                                    | nov_forward                       | GAACCGTCAATGTGAGATGCTG                |
|                                                                                                                                                                                                               | nov_reverse                       | GTTCTTGAAGTGCAGGTGGATG                |

|                         |                      |                            |
|-------------------------|----------------------|----------------------------|
| <i>OPRK1</i>            | oprk1_forward        | ATCAATATCTGCATCTGGCTGCT    |
|                         | oprk1_reverse        | TAGTCATCATCTGGGAACTGCAA    |
| <i>PCGEM</i>            | pcgem_forward        | ATCATGAGGCATTTTCAGAGTGC    |
|                         | pcgem_reverse        | AAGGCACCTTTGTTTTCTCCAG     |
| <i>PRCN1</i>            | prcn1_forward        | TGGAAAGGTGTCAGTGAGCAAG     |
|                         | prcn1_reverse        | AATATCAGCCCTTGGAATCTGG     |
| <i>PSA</i>              | psa_forward          | GATGCTGTGAAGGTCATGGA       |
|                         | psa_reverse          | TGGAGGTCCACACACTGAAG       |
| <i>PVT1</i>             | pvt1_forward         | TGGAATGTAAGACCCCGACTCT     |
|                         | pvt1_reverse         | GATGGCTGTATGTGCCAAGGT      |
| <i>SFPQ1</i>            | sfpq1_iso1_forward   | TCGTA CTGTTAGGCCCTTGG      |
|                         | sfpq1_iso1_reverse   | AACCTTGCATGAAGAGCACC       |
| <i>SFPQ1</i>            | sfpq1_iso2_forward   | AAA ACTTGCCCAGAAGAATCCA    |
|                         | sfpq1_iso2_reverse   | CCCTTTGCTGTTTTTCCATTTC     |
| <i>SI</i>               | si_forward           | TTTTGGCAGCCTTATCCAAG       |
|                         | si_reverse           | CAATCAGAGAGATTTC CAATCCA   |
| <i>SUZ12</i>            | suz12_forward        | TGACTCGTCCAGGAAGAAGAGAG    |
|                         | suz12_reverse        | CAAATGTCTTTTCCCCATCCTC     |
| <i>TMPRSS2</i>          | tmprss2_forward      | CTGGTGGCTGATAGGGGAT        |
|                         | tmprss2_reverse      | GTCTGCCCTCATTTGTCGAT       |
| <i>TNFRSF21</i>         | tnfrsf21_forward     | TTCCTCTTGGCCTTGCTCTTAG     |
|                         | tnfrsf21_reverse     | TGTCATCAAAGATAGGCTGCAAG    |
| <i>U1-19</i>            | u1_forward           | CCCCACTACCACAAATTATGCAG    |
|                         | u1_reverse           | AAACGAAGGTGGTTTTTCTCAGG    |
| <b>Assay: ChIP-qPCR</b> |                      |                            |
| <i>NOV</i>              | nov_enhancer_forward | ATGCACGTGCGTGTA AACAG      |
|                         | nov_enhancer_reverse | CACAAGGTTTCTGGGTAGGG       |
|                         | nov_promoter_forward | GCTGAGTGGTTTCTCCTTGTC      |
|                         | nov_promoter_reverse | ACACCAGACAGCATGAGCAG       |
| <i>PSA</i>              | psa_enhancer_forward | GCCTGGATCTGAGAGAGATATCATC  |
|                         | psa_enhancer_reverse | ACACCTTTTTTTTTCTGGATTGTTG  |
|                         | psa_promoter_forward | CCTAGATGAAGTCTCCATGAGCTACA |
|                         | psa_promoter_reverse | GGGAGGGAGAGCTAGCACTTG      |

**Supplementary Table S2. List of androgen-responsive genes in LNCaP cells. 1155 genes had their expression significantly downregulated in androgen treated cells (+R1881) compared with the expression in hormone-deprived cells (-R1881), and 883 genes showed significantly upregulated expression in androgen treated cells (+R1881) compared with the expression in hormone-deprived cells (-R1881).**

| <b>883 genes with significantly upregulated expression in androgen treated cells (+R1881)</b>                                                                                                                                                                                                                                                                                                                                                                                                                                                                                                                                                                                                                                                                                                                                                                                                                                                                                                                                                                                                                                                                                                                                                                                                                                                                                                                                                                                                                                                                                                                                                                                                                                                                                                                                                                                                                                                                                                                                                                                                                                                                                                                                                                                                                                                                                                                                                                                                                                                                                                                                                                                                                                                                                                                                                                                                                                                                                                                                                                                                                                                                                                                           |
|-------------------------------------------------------------------------------------------------------------------------------------------------------------------------------------------------------------------------------------------------------------------------------------------------------------------------------------------------------------------------------------------------------------------------------------------------------------------------------------------------------------------------------------------------------------------------------------------------------------------------------------------------------------------------------------------------------------------------------------------------------------------------------------------------------------------------------------------------------------------------------------------------------------------------------------------------------------------------------------------------------------------------------------------------------------------------------------------------------------------------------------------------------------------------------------------------------------------------------------------------------------------------------------------------------------------------------------------------------------------------------------------------------------------------------------------------------------------------------------------------------------------------------------------------------------------------------------------------------------------------------------------------------------------------------------------------------------------------------------------------------------------------------------------------------------------------------------------------------------------------------------------------------------------------------------------------------------------------------------------------------------------------------------------------------------------------------------------------------------------------------------------------------------------------------------------------------------------------------------------------------------------------------------------------------------------------------------------------------------------------------------------------------------------------------------------------------------------------------------------------------------------------------------------------------------------------------------------------------------------------------------------------------------------------------------------------------------------------------------------------------------------------------------------------------------------------------------------------------------------------------------------------------------------------------------------------------------------------------------------------------------------------------------------------------------------------------------------------------------------------------------------------------------------------------------------------------------------------|
| A_21_P0014882; A_33_P3210561; A_33_P3221980; A_33_P3298980; A_33_P3301445;<br>A_33_P3329740; A_33_P3330413; A_33_P3349727; A_33_P3365845; A_33_P3367970;<br>A_33_P3371450; A_33_P3375026; A_33_P3391120; A_33_P3402086; A_33_P3403356;<br>A_33_P3407049; A1BG; ABCC1; ABCC4; ABHD2; ABHD3; ABL1; AC003101.1;<br>AC006483.5; AC133680.1; AC142381.1; ACACA; ACAD8; ACOX3; ACSL3; ACTL8;<br>ADAMTS1; ADH1C; ADPRM; ADRA2A; ADRB1; AF086546; AF130105; AFF3; AGPAT5;<br>AGR2; AHNAK; AK096255; AK130248; AK4; AKAP1; AKAP12; AKAP5; AL022344.7;<br>AL133645; ALDH1A3; ALDH4A1; ANK1; ANKH; ANKRD26P3; ANKRD37; ANXA1;<br>AP000525.9; AP004550.1; APLN; APPBP2; ARAP2; ARG2; ARHGAP26; ARHGAP28;<br>ARMC12; ARSG; ASGR2; ASRGL1; ATAD2; ATG101; ATMIN; ATP10A; ATP1A1; ATP1A4;<br>ATP2C1; AZGP1; B2M; B3GNT2; BAIAP2; BC018676; BC022164; BC028196; BC029496;<br>BC045716; BC066989; BC071853; BCAP29; BEND4; BET1; BHLHA15; BHLHE40; BICD2;<br>BMPR1A; BMPR1B-AS1; BTAF1; BTG1; BU171032; C19orf48; C19orf83; C1orf116; C1orf21;<br>C1QTNF9B-AS1; C2orf27A; C2orf76; C3orf35; C3orf58; C9orf152; C9orf72; C9orf91;<br>CA5BP1; CACNG4; CAMKK2; CAND1.11; CANT1; CARTPT; CASC10; CBLL1; CBWD5;<br>CCDC126; CCDC138; CCDC141; CCDC15; CCDC189; CCDC74A; CCDC74B; CD518305;<br>CDC14B; CDC23; CDC25A; CDC42EP2; CDC42SE1; CDK2; CDYL2; CECR6; CENPN;<br>CEP44; CEP83; CERS6; CHAC2; CHD7; CHKA; CHRDL1; CHRFAM7A; CITED1; CLGN;<br>CMC2; CNGB3; COL12A1; COL23A1; CORO2A; COTL1; CREB3L2; CREB3L4; CRISPLD2;<br>CRLS1; CROT; CSNK1A1L; CSNK1G3; CSRP2; CTD-2292M16.8; CTD-2314B22.1; CTD-<br>2538C1.2; CTF1; CU692082; CUX2; CXCR4; CYP11A1; CYP1A1; CYP2U1; CYP4F30P;<br>CYTH1; DA197111; DBI; DDIAS; DEFB132; DEGS1; DEPDC1B; DFN31; DHCR24;<br>DHRS12; DIO2; DKFZP586I1420; DLX1; DLX2; DNAJB9; DNAJC3; DNASE2B; DNM1L;<br>DOCK4; DOCK5; DRD2; DSC1; DSG1-AS1; DUBR; DUSP2; DYNLL2; EAF2; EBP; ECI2;<br>EDEM1; EDEM3; EFCAB12; EFNA5; EFNB2; EGFR; EHBP1; EIF4E2; ELK4; ELL2;<br>ELOVL1; ELOVL2; ELOVL5; ELOVL7; EML1; EMP2; ENDOD1; ENST00000613924;<br>ENST00000614063; ENST00000619210; ENST00000620237; ENST00000624585;<br>ENST00000624615; ENTPD7; EPDR1; EPHA7; EPN2; ERGIC2; ERLEC1; ERN1; ERO1L;<br>ERRF1; ESRP2; ETV1; EXTL2; FAM103A1; FAM105A; FAM13A-AS1; FAM151B;<br>FAM174B; FAM188B; FAM189A2; FAM83A-AS1; FAM91A1; FAR2P1; FAR2P2; FASN;<br>FAXDC2; FBXW2; FCN2; FERMT2; FGD4; FGFR2; FGFR3; FGFR1; FHDC1; FICD; FIG4;<br>FKBP1B; FKBP5; FMO5; FOS; FOSL2; FOXD4; FRK; FRYL; FXYD3; FZD5; FZD8;<br>GABPB1; GABPB1-AS1; GADD45G; GAN; GAPLINC; GAS8-AS1; GCFC2; GCNT1; GFM1;<br>GHR; GLB1L2; GLI1; GLRX2; GLUD1; GLUD2; GLYATL1; GLYATL2; GMPPB; GNB4;<br>GNMT; GOLGA2; GOLGA4; GOLPH3; GPC6; GPR158; GREB1; GRHL2; GRIN3A;<br>GUCY1A3; H2AFZ; HACD2; HCLS1; HEBP2; HERC4; HERC5; HERC6; HERPUD1; HES2;<br>HEY1; HGD; HIF1A-AS2; HIPK2; HK2; HM13; HMGCR; HMGCS1; HMGXB3; HOMER2;<br>HOPX; HS3ST1; HSD17B2; HSD17B4; HSPA13; ID1; ID2; ID3; IDH1; IDI1; IDI2-AS1; IGF1;<br>IGF1R; IGFBP3; IGFBP5; IL6R; IMPDH1; IMPDH1P11; INPP4B; INSIG1; INTS10; IRS2;<br>ITGAV; JHDM1D-AS1; JMJD1C-AS1; JPH1; KANK1; KAZALD1; KBTBD11-OT1; KCND2;<br>KCNG3; KCNMA1; KCNN2; KCTD3; KCTD9; KDEL2; KDM7A; KIF22; KLB; KLF4; |

KLF5; KLHL29; KLK15; KLK2; KLK3; KLK4; KLK5; KLKP1; KMT5A; KRT18; KRT18P19; KRT18P26; KRT18P28; KRT18P40; KRT18P42; KRT18P49; KRT18P52; KRT18P55; KRT18P59; KRT18P64; KRT18P65; KRT19; KRT19P2; KRT8; KRT83; KRT8P15; KRT8P37; KRT8P44; KRT8P48; L3MBTL3; LA16c-380H5.4; LA16c-83F12.6; LAMA1; LAMA3; LAMC1; LAT2; LDLR; LECT1; LIFR; LIMCH1; LIN7B; LINC00644; LINC00883; LINC01296; LINC01299; LINC-PINT; lnc-AC016251.1-9:2; lnc-AGGF1-3:17; lnc-ANKH-1:3; lnc-C14orf23-3:1; lnc-C16orf61-2:1; lnc-C9orf82-1:1; lnc-CBLL1-1:3; lnc-CETP-1:1; lnc-CETP-1:2; lnc-COX4NB-1:1; lnc-DRGX-1:1; lnc-FAM75A6-1:1; lnc-GLYATL2-2:3; lnc-HDAC9-3:1; lnc-HPCAL1-1:6; lnc-KCNE4-1:1; lnc-KLRG2-1:1; lnc-KRT80-3:1; lnc-MAGEB10-2:1; lnc-MIXL1-2:1; lnc-MRPL48-1:1; lnc-MUC20-3:1; lnc-OSBPL9-1:1; lnc-PEA15-1:1; lnc-PERP-2:2; lnc-PIK3R1-1:1; lnc-PPM1D-1:1; lnc-RAB4A-1:2; lnc-RASL10A-1:1; lnc-SCCPDH-1:2; lnc-SLC7A6OS-2:1; lnc-ST3GAL5-1:1; lnc-TBX15-2:1; lnc-TSKU-1:1; lnc-WISP1-1:1; lnc-XRCC2-4:1; LOC100506023; LOC100506860; LOC100508046; LOC101927322; LOC101927482; LOC101927495; LOC158435; LOC283194; LOC284648; LOC284825; LOC440040; LOC440896; LOC440910; LOC642426; LOC81691; LONRF1; LRCH1; LRIG1; LRRC16A; LRRC8A; LRRFIP2; LSS; LY9; MAF; MAFK; MALT1; MAP2K4; MAP7D1; MAP9; MAPK10; MAPK6; MARCH5; MBOAT2; MCCC2; MCEE; MCFD2; MDGA1; MEGF9; MEMO1; MERTK; MESP1; MFSD2A; MICAL1; MICALCL; MINOS1-NBL1; MIPEP; MIR17HG; MIRLET7BHG; MLPH; MORC4; MORN1; MPC2; MPHOSPH9; MPP6; MPRIP; MPZL1; MRPS18A; MTCL1; MTERF4; MTFP1; MTM1; MTMR11; MTMR12; MTMR2; MTMR9; MTOR; MXD1; MYBL1; MYOF; MZT2A; NANS; NAT1; NAT2; NCAPD3; NDFIP2; NDRG1; NDRG4; NEBL; NEDD4L; NFIB; NFKBIA; NKX3-1; NKX3-2; NM\_001098516; NM\_001199814; NM\_031953; NMD3; NNMT; NPC1; NPPC; NPR1; NR5A2; NSMAF; NT5DC3; NTNG1; NUP58; NUP98; NUPL1; ODC1; OLA1; OPN1MW; OR7E47P; ORC5; ORM1; ORM2; OSBPL8; OTUD7B; OTULIN; PACS1; PACSIN2; PAK1IP1; PALMD; PAPSS1; PAQR4; PAQR6; PART1; PARVA; PASK; PCDH1; PCDH20; PCNA-AS1; PCTP; PDIA5; PDLIM5; PDZRN3; PEA15; PER1; PEX10; PFKFB2; PGC; PGM2; PGM3; PHF20L1; PHGR1; PI4K2B; PIAS1; PIGH; PLA2G5; PLPP1; PLPP3; PLPP6; PMEPA1; PNKD; PNMA1; POLR3E; POP1; POTE3; POTE4; POTEI; POTE5; PPFIA3; PPFIBP1; PPFIBP2; PPM1A; PPM1D; PPM1K; PPP1CB; PPP2CB; PRAMEF8; PRDM1; PRDX6; PRIM2; PRKAR2A; PRKAR2B; PRKCA; PRKCH; PRR16; PSD3; PSMA6; PTCRA; PTGER4; PTGFR; PTN; PTPLB; PTPN21; PTPN9; PTPRJ; PTPRM; PTPRN2; RAB27A; RAB28; RAB3B; RAB4A; RAB6C-AS1; RAD54B; RALGPS2; RALYL; RARA; RARB; RASL10A; RBM24; RDH10; REP15; REPS2; RFK; RFPL2; RFPL3S; RGS16; RHCG; RHOBTB3; RHOU; RIC8B; RLN1; RNF112; RNF138; RNF138P1; RNF150; RNF223; ROR1; RP11-1078H9.6; RP11-1079K10.3; RP11-196I18.3; RP11-236B18.2; RP11-314A15.2; RP11-356O9.1; RP11-416N13.1; RP11-456K23.1; RP11-469M7.1; RP11-48B3.4; RP11-521C20.2; RP11-561O23.7; RP11-65J21.3; RP11-738O11.9; RP11-774O3.3; RP1-90G24.6; RP4-655J12.4; RP5-1198O20.4; RPL27A; RWDD4; S100P; SACS; SAP30; SASH1; SAT1; SCAP; SDCBP; SDCBPP1; SEC11C; SEC14L2; SEC24A; SEC24B; SEC24D; SEC61G; SEMA3C; SEPP1; SERPINE2; SETBP1; SGK1; SGK223; SGK3; SH3D21; SHROOM3; SIM2; SIPA1L2; SLAIN2; SLC16A1; SLC16A6; SLC22A1; SLC22A17; SLC22A23; SLC25A20; SLC25A33; SLC25A37; SLC25A40; SLC26A2; SLC2A1; SLC30A7; SLC33A1; SLC35F2; SLC35G5; SLC39A10; SLC39A14; SLC39A7; SLC41A1; SLC43A1; SLC45A3; SLC4A4; SLCO2A1; SLF1; SLIT3; SMAD9; SMAGP; SMIM13; SMPD2; SMPD4; SMS; SNAP23; SNORA19; SNORA30; SNORA80A; SNORD90; SOCS2; SOCS2-AS1; SORD; SP9; SPATA13; SPATC1L; SPATS2L; SPCS3; SPDEF; SPDYA; SPHAR; SPRED1; SPTB; SRF; SSR3; SSX2IP; ST20-AS1; ST6GAL1; ST6GALNAC1;

STARD3NL; STK17B; STK39; SULT1C3; SUN2; SWT1; SYNJ1; SYT4; SYTL1; TACSTD2; TAF1A; TAOK3; TARP; TARS; TASP1; TBC1D1; TBC1D4; TBC1D8; TBRG1; TBX2; TBXAS1; TCAF1; TCAF2; TCONS\_12\_00006720; TCONS\_12\_00017540; TCONS\_12\_00018295; TCONS\_12\_00018296; TCONS\_12\_00028266; TENM1; TEX2; TG; THC2568408; THC2610134; THC2626681; THC2636494; THC2665222; THC2685534; THC2719114; THRAP3; THRB; THSD7A; THUMPD1; THYN1; TIPARP; TM4SF1; TMCC3; TMED9; TMEFF2; TMEM100; TMEM164; TMEM79; TMEM87A; TMEM87B; TMPRSS2; TNFAIP3; TNFAIP8; TNFRSF19; TNK2; TPD52; TRAPPC11; TRG-AS1; TRIB2; TRIM24; TRIM36; TRIM48; TRIM49; TRIM49B; TRIM49D1; TRIM51; TRIM53AP; TRMT6; TRPM7; TSKU; TTC12; TTC5; TTN; TUBA3C; TUBA3D; TUBA3FP; TUBA3GP; TWIST1; TXNDC16; U71363; UAP1; UBE2G1; UBE2J1; UBE2NL; UGT1A6; UGT2B7; UHRF2; UHRF2P1; USP10; USP8; VEGFA; VGF; VIMP; VLDLR; VLDLR-AS1; VSTM2A; WDR41; WDYHV1; WIPI1; WNT7B; WTH3DI; WTIP; WWC1; XM\_003959913; XR\_109259; XR\_109894; XR\_171099; XR\_242328; XR\_242411; XR\_424109; XR\_428440; XR\_433669; ZBED3-AS1; ZBTB1; ZBTB10; ZBTB16; ZBTB24; ZBTB44; ZC3HAV1; ZCCHC6; ZDHHC8P1; ZHX1; ZNF18; ZNF385B; ZNF532; ZNF652; ZNF69; ZNF814; ZNRF2; ZNRF2P1; ZP1.

**1155 genes with significantly downregulated expression in androgen treated cells (+R1881)**

A\_21\_P0014213; A\_21\_P0014894; A\_32\_P48615; A\_33\_P3222600; A\_33\_P3241150; A\_33\_P3265935; A\_33\_P3294078; A\_33\_P3311911; A\_33\_P3346526; A\_33\_P3392350; A2M-AS1; ABCA1; ABCA12; ABCC5; ABCC6; ABCC6P1; ABCG1; ABLIM1; ABTB2; AC007562.1; AC010967.2; AC073283.4; AC093901.1; AC141928.1; ACAA2; ACADSB; ACKR3; ACTA2; ACTRT3; ADAM23; ADCY1; ADCY2; ADD2; ADGRB2; ADGRG6; ADGRV1; ADM; ADORA2B; ADRA2C; AEBP1; AGL5-AS1; AGT; AHNK2; AIDA; AJUBA; AK021734; AK058041; AK092862; AK123308; AK124361; AK124859; AK125166; AK125979; AK129982; AKR1C1; AKR1C3; AL117431; AL523350; ALCAM; ALPK1; ALX4; AMIGO2; AMIGO3; ANGPTL2; ANKRD16; ANKRD18A; ANKRD18B; ANKRD20A11P; ANKRD20A12P; ANKRD20A2; ANKRD20A3; ANKRD20A5P; ANKRD20A8P; ANKRD20A9P; ANKRD28; ANKRD36B; ANKRD62P1; ANO2; ANP32E; ANPEP; ANTXR1; ANXA9; AOC1; AP000253.1; APBA1; APOLD1; APPL1; ARHGAP18; ARHGAP20; ARHGAP27; ARHGAP32; ARHGEF10; ARHGEF17; ARHGEF40; ARL4D; ASAP2; ASB13; ASIC1; ASNSP1; ASS1; ATG16L2; ATG3; ATOH7; ATP11A; ATP1B2; ATP2B1; ATP2B4; ATP8A1; ATXN7L1; AUTS2; BAHCC1; BAMBI; BANK1; BARD1; BASP1; BBS9; BC092495; BCAM; BCHE; BDH2; BEND5; BEND7; BEST1; BEST4; BFSP1; BHLHE41; BIRC3; BLNK; BMF; BMX; BRSK2; BTB; BTN2A2; BX648696; C10orf10; C12orf60; C14orf132; C14orf93; C16orf45; C16orf74; C16orf89; C18orf61; C1orf63; C1QTNF3; C1QTNF6; C1R; C1RL-AS1; C21orf58; C2orf15; C4orf32; C4orf46; C5orf30; C9orf92; CA12; CABLES1; CACNA1G; CACNB2; CADM1; CALD1; CAMK1D; CAMK2N1; CAPRIN2; CAPS2; CARN1; CASC1; CASC2; CBLN2; CBR3; CCDC14; CCDC18-AS1; CCDC69; CCDC88B; CCDC93; CCNE2; CCNG2; CCNO; CD24; CD83; CDCA7L; CDH18; CDH26; CDH3; CDHR3; CDK8; CDNF; CDON; CDR2L; CELA2A; CERK; CFAP70; CHAC1; CHADL; CHAF1B; CHN1; CHRM1; CLCN4; CLCN5; CLDN2; CNBD1; CNKSR3; CNTN2; CNTN5; COBL; COBLL1; COL16A1; COL18A1; COL5A2; COL9A2; COL9A3; COLCA1; COLQ; COMP; CPAMD8; CRABP2; CREBRF; CRNDE; CROCCP2; CSMD1; CTBP1; CTD-2251F13.1; CTD-2342N23.3; CTTNBP2NL; CXorf36; CYTH3; DAND5; DAPK2; DCBLD2; DCDC2; DCHS1; DDB2; DDC; DDO; DDR2; DDX11L16; DDX58; DENND1B; DENND3;

DENND5B; DEPTOR; DFNA5; DGKH; DICER1-AS1; DIDO1; DIO3; DIXDC1; DLGAP1-AS3; DMKN; DNAH11; DNAH2; DOK1; DOK7; DPP4; DPYSL3; DQ786257; DRAIC; DSC2; DSE; DSEL; DUSP26; DUSP6; EDN2; EFCAB11; EFHD1; EFR3B; EGLN3; ELFN2; ENC1; ENOX1; ENPP4; ENPP5; ENST00000612143; ENST00000614678; ENST00000614987; ENST00000615792; ENST00000619168; ENST00000621666; ENST00000621996; ENST00000623723; ENST00000624675; ENTPD3; EPB41; EPB41L4A; EPHX1; EPS8; ERBB2; ESPN; ETV6; EXPH5; EXTL1; F2R; FALEC; FAM102A; FAM110C; FAM134B; FAM175A; FAM177B; FAM182B; FAM184A; FAM184B; FAM198A; FAM198B; FAM19A2; FAM201A; FAM212B; FAM217B; FAM221B; FAM224A; FAM229B; FAM47E; FAM49A; FAM78A; FANK1; FAS; FAXC; FBXL2; FBXL22; FBXO15; FCGR2C; FCN1; FEZ1; FGD3; FGD6; FGF13; FHOD3; FLJ31104; FLJ36000; FLJ43315; FMNL3; FOLH1; FOLH1B; FOXD3; FOXN3; FOXN4; FOXO4; FOXO6; FOXP4-AS1; FOXQ1; FRMD5; FRMPD1; FRMPD2; FSCN1; FUT10; FUT8; FUT8-AS1; FYN; FZD2; FZD3; FZD4; GALNT10; GALNT14; GALNT18; GAREM1; GATA6; GATS; GCA; GCG; GHRL; GIMAP2; GIMAP6; GJB2; GLCC11; GLCE; GLI3; GLIPR1L2; GLIS2; GLS2; GOLGA2P2Y; GOLGA2P6; GOLGA6L4; GOLGA6L9; GOLGA8R; GOLPH3L; GPAT3; GPER1; GPR137B; GPR20; GPR63; GPRIN2; GPX8; GRAMD1C; GRB10; GRB14; GRIK1; GRIK2; GRK5; GS1-421I3.2; GSC; GSTA2; GSTA5; GUCY1B2; GUSBP1; GUSBP2; HACL1; HAGLROS; HCG8; HEG1; HEPACAM; HLA-DQB1; HOTAIRM1; HOXA10; HOXA11-AS; HOXA3; HOXA5; HOXA7; HOXA9; HOXB5; HOXB6; HOXB-AS1; HOXC12; HOXC13-AS; HOXC4; HOXC5; HOXC8; HOXC9; HOXC-AS1; HOXC-AS3; HRK; HS6ST2; HSD17B7; HSPA12A; HSPA4L; HTR2C; HTRA1; IER5; IFIH1; IFIT2; IFIT5; IFITM1; IGFALS; IGIP; IGKV1-16; IGKV1D-8; IGKV10R2-108; IKZF2; IKZF3; IL15; IL17C; IL17RB; IL17RD; IL1RAP; IL1RN; IL27RA; IL36G; IL4R; INHBB; INSIG2; INTS8; IQCH-AS1; IQCJ-SCHIP1; IRF1; IRF2BPL; IRX3; IRX5; ITGB4; ITGB7; ITPKA; ITPR1; JAK3; JDP2; KALRN; KATNAL2; KCNAB2; KCNG1; KCNIP3; KCNJ3; KCNK13; KCNK5; KCNMB4; KCNS3; KCNU1; KDM4D; KDM6A; KHDRBS3; KHK; KIAA0408; KIAA0922; KIAA1217; KIAA1257; KIAA1324; KIAA1462; KIF21A; KIF25; KIF3C; KIF5B; KITLG; KLHL1; KLHL24; KLHL3; KLLN; KMT2C; KSR2; LAMB1; LCN15; LETMD1; LFNG; LIF; LIMA1; LIMS2; LINC00467; LINC00476; LINC00478; LINC00565; LINC00648; LINC00673; LINC00853; LINC00858; LINC00933; LINC01003; LINC01006; LINC01021; LINC01024; LINC01133; LINC01137; LINC01138; LINC01184; LINC01193; LINC01351; LINC01354; LINC01503; LINC01569; LINGO3; lnc-ACCSL-1:1; lnc-ACSS3-2:1; lnc-ACSS3-2:2; lnc-ADA-1:2; lnc-BDKRB1-1:1; lnc-BHLHE41-2:12; lnc-C11orf39-3:1; lnc-C12orf61-3:1; lnc-C1orf122-1:1; lnc-C1orf201-2:2; lnc-C1orf201-3:2; lnc-C5orf43-3:2; lnc-CCKAR-1:1; lnc-CCKAR-1:2; lnc-CCNE2-1:1; lnc-COBLL1-1:1; lnc-COLQ-1:1; lnc-CTD-2054N24.2.1-1:1; lnc-DCAF10-2:1; lnc-DHX34-2:1; lnc-DTHD1-2:1; lnc-DYDC1-3:1; lnc-EVX1-5:3; lnc-EXOC4-2:1; lnc-EYS-2:1; lnc-F8A2-2:1; lnc-FAM72C-2:1; lnc-FOXN1-1:1; lnc-FURIN-1:1; lnc-FZD4-1:1; lnc-GOLPH3L-1:1; lnc-HIATL1-1:1; lnc-INTS8-1:1; lnc-INTS9-1:3; lnc-IRF2BPL-2:1; lnc-IRX3-4:5; lnc-JMJD7-PLA2G4B-1:2; lnc-JMJD7-PLA2G4B-2:1; lnc-KB-1980E6.3.1-1:2; lnc-KDM6A-1:3; lnc-KIAA0195-1:1; lnc-KIAA0319L-1:1; lnc-LOXL1-1:1; lnc-MAT2B-3:19; lnc-MAT2B-3:8; lnc-MBL2-2:3; lnc-MDM4-1:1; lnc-MLLT4-1:1; lnc-OIT3-2:1; lnc-PDCD11-1:1; lnc-PDE2A-1:1; lnc-PGR-1:1; lnc-PHF3-1:1; lnc-PHGDH-2:1; lnc-PRAGMIN.1-3:3; lnc-QKI-5:1; lnc-RASSF7-1:1; lnc-RP11-293M10.1.1-1:1; lnc-RP3-377D14.1.1-3:12; lnc-RPLP1-1:14; lnc-RPLP1-1:15; lnc-SLC2A9-1:1; lnc-SLC38A8-4:2; lnc-SLC3A2-2:1; lnc-SRBD1-1:1; lnc-STK32C-2:1; lnc-THNSL1-2:1; lnc-TMEM140-1:1; lnc-TNFAIP8L1-1:1; lnc-TRAPPC8-2:1; lnc-TRH-2:1; lnc-TULP4-1:1; lnc-VSIG2-1:1; lnc-WASF3-1:1; lnc-ZBBX-3:1; lnc-ZNF667-2:1; lnc-ZNF674-3:2; lnc-ZNF74-1:5; LNP1; LNX2;

LOC100129203; LOC100130357; LOC100131347; LOC100288798; LOC100288911;  
LOC100289495; LOC100505478; LOC100506082; LOC100506476; LOC100506990;  
LOC100507487; LOC100996255; LOC100996455; LOC101927056; LOC101927571;  
LOC101927822; LOC101928103; LOC101929395; LOC101929633; LOC155060; LOC257396;  
LOC283575; LOC388242; LOC400958; LOC401585; LOC642929; LOC643072; LOC643770;  
LOC646214; LOC650293; LOC728730; LPCAT4; LRIG3; LRRC20; LRRC31; LRRC4C;  
LRRC75A; LRRC9; LRRN1; LTF; LTN1; LUZP2; LYN; MACF1; MAGI3; MAL; MAN1C1;  
MANBA; MANEA; MANEA-AS1; MAP2K6; MAP3K13; MAP3K8; MAPK4; MAPRE2;  
MATN2; MB21D2; MCAM; MCF2L; MCTP1; MCU; MECOM; MED14OS; MET; METTL15;  
MEX3B; MFI2-AS1; MGC16275; MIR4697HG; MIR600HG; MMP16; MMP24; MNX1; MNX1-  
AS1; MORC3; MOV10L1; MRC2; MRS2; MT1DP; MTMR9LP; MUT; MX1; MYB; MYH10;  
MYLK; MYNN; MYRIP; MYT1; MYZAP; NAB1; NABP1; NAIP; NANOS1; NAP1L3;  
NAPEPLD; NAT8L; NCOA7; NDUFAF4; NEK1; NEK6; NET1; NETO1; NEURL3; NINL;  
NIPAL1; NIPSNAP3A; NIPSNAP3B; NKAPP1; NKD2; NLGN4X; NLRC3; NOV; NOVA1;  
NPAS1; NR\_024011; NR3C1; NR3C2; NR4A2; NREP; NRG3; NRIP3; NRXN1; NSG1; NTN4;  
NUAK1; NUAK2; NUDT8; NUTM2F; OCLN; OGFRL1; OPRK1; OPTN; OR51E1; OSBPL10;  
OSR2; OXTR; P2RX7; PABPC5; PAG1; PAK2; PAN3-AS1; PAPP; PARP8; PAX1; PBX1;  
PBXIP1; PCDH11X; PCED1B; PDE4D; PDE4DIP; PDGFRL; PDLIM3; PDZK1IP1; PEG3;  
PELI2; PGM2L1; PGM5P2; PHF12; PHLPP1; PIGZ; PIK3IP1; PIK3IP1-AS1; PIK3R3; PITX1;  
PKIA; PKIB; PKNOX2; PLA2G2A; PLA2G4D; PLCB2; PLCB4; PLD6; PLEKHA2; PLGLB1;  
PLIN4; PLS1; PMP22; PMS2; PPP1R14C; PPP2R2A; PRAC2; PRDM12; PRKAG2-AS1;  
PRKD1; PRKG2; PRSS16; PRSS23; PSAT1; PSAT1P1; PSAT1P3; PTPRK; PTPRR; PURA;  
RAB17; RAB19; RAB33A; RAB37; RABL3; RAD21-AS1; RAI14; RANBP3L; RAPIGDS1;  
RAP2B; RAP2C-AS1; RARRES3; RASA4; RASL11B; RASSF2; RASSF5; RASSF8-AS1;  
RBP5; RBPMS; RCAN2; RCAN3; RDM1; REEP1; RELB; RFX3-AS1; RGL1; RGS10; RHBG;  
RHOH; RIMS1; RMDN1; RNASEL; RNF125; RNF144B; RNF157-AS1; RNF43; RNFT2;  
ROR2; RP11-1000B6.3; RP11-1023L17.1; RP11-1081M5.1; RP11-1081M5.2; RP11-119D9.1;  
RP11-12K11.2; RP11-253M7.4; RP11-254F7.2; RP11-267A15.1; RP11-299H21.1; RP11-  
319E16.2; RP11-319F12.2; RP11-329B9.4; RP11-356J5.12; RP11-379B8.1; RP11-383J24.6;  
RP11-401P9.4; RP11-421M1.8; RP11-450H5.1; RP11-457M11.5; RP11-45M22.5; RP11-  
493L12.4; RP11-499E18.1; RP11-539L10.2; RP11-578F21.6; RP11-57A19.2; RP11-629O1.2;  
RP11-657O9.1; RP11-666A20.4; RP11-699A5.2; RP11-725D20.1; RP11-760H22.2; RP11-  
77P16.4; RP11-85M11.2; RP11-888D10.3; RP11-98G7.1; RP13-726E6.1; RP13-941N14.1; RP1-  
65J11.1; RP4-800G7.2; RPS6KA5; RPS6KL1; RSBN1L-AS1; RTN4R; RTN4RL1; RYR2;  
S100A3; SCAI; SCGB1D1; SCGB1D2; SCHIP1; SCNN1D; SDAD1P1; SDC3; SDC4; SELL;  
SEMA5B; SEPT6; SERAC1; SERPINB5; SERPINI1; SESN3; SFR1; SH2D3C; SH3BGRL2;  
SH3BP5; SH3RF1; SHC3; SHC4; SHISA3; SI; SKAP2; SLC12A2; SLC12A6; SLC16A14;  
SLC16A7; SLC18B1; SLC1A7; SLC20A2; SLC22A10; SLC22A11; SLC23A1; SLC2A13;  
SLC30A3; SLC35F3; SLC38A9; SLC40A1; SLC44A1; SLC51A; SLC52A3; SLC6A12;  
SLC6A13; SLC7A2; SLCO5A1; SLITRK3; SMA4; SMAD3; SMC6; SMIM3; SNAI3; SNRK;  
SNRK-AS1; SNX18P3; SNX18P7; SNX22; SOBP; SOGA3; SORBS1; SORBS2; SORL1;  
SOWAHB; SOX11; SPAG5-AS1; SPTAN1; SPTLC3; SRCIN1; SRGAP2; SRGAP2B; SRGAP3;  
SRP14-AS1; SSBP2; ST3GAL1; ST5; ST7; ST7-AS1; ST7-OT4; ST8SIA4; STAC; STARD5;  
STK3; STOX1; STOX2; STRBP; STXBP5L; STXBP6; SULF2; SUSD4; SUSD6; SVIL; SYBU;  
SYNE1; SYNE2; SYNPO; SYTL2; TAL2; TARBP1; TARSL2; TBX10; TBX19; TCF7L2;  
TCONS\_12\_00000198; TCONS\_12\_00000562; TCONS\_12\_00001498; TCONS\_12\_00007046;  
TCONS\_12\_00008795; TCONS\_12\_00008799; TCONS\_12\_00008879; TCONS\_12\_00008962;  
TCONS\_12\_00017138; TCONS\_12\_00017422; TCONS\_12\_00018853; TCONS\_12\_00018976;

TCONS\_12\_00019490; TCONS\_12\_00020648; TCONS\_12\_00020852; TCONS\_12\_00021053; TCONS\_12\_00022830; TCONS\_12\_00022832; TCONS\_12\_00023776; TCONS\_12\_00028458; TCONS\_12\_00028604; TCONS\_12\_00028817; TCONS\_12\_00029295; TCONS\_12\_00029343; TCTEX1D4; TDP1; TFAP2A-AS1; TFF3; TGM3; THBS4; THC2471881; THC2507047; THC2537043; THC2548652; THC2563836; THC2567789; THC2600547; THC2601170; THC2644314; TIAM2; TIMP2; TLE1; TLE3; TLL1; TMCC2; TMEM116; TMEM117; TMEM144; TMEM158; TMEM181; TMEM266; TMEM38B; TMEM45A; TMEM51; TMPRSS6; TMSB4X; TNFRSF10D; TNFRSF11B; TNFRSF12A; TNFRSF21; TNFSF15; TNIK; TNRC6B; TNS1; TOX3; TP53INP1; TPCN1; TPPP; TPRXL; TRBV30; TRERF1; TRIB1; TRIM2; TRIM38; TRIM45; TRNP1; TRPS1; TSHZ1; TSHZ3; TSL; TSPAN10; TSPAN12; TSPAN5; TTBK1; TTBK2; TTN-AS1; TTTY14; TTTY6; TUBB8; TULP4; TYRP1; UACA; UBAC2-AS1; UBE2E1-AS1; UBE2Q2P1; UBE2Q2P3; UFL1; UGT2B10; UGT2B11; UGT2B15; UNC5B; USP3-AS1; VASH2; VAV3; VGLL4; VIPR2; VN1R108P; VOPP1; VPS13A; VPS13B; VPS54; VSTM2L; VTA1; VWA2; VWF; WASIR2; WEE2-AS1; WI2-85898F10.1; WLS; WNT4; XM\_006723786; XR\_109175; XR\_111287; XR\_158870; XR\_159012; XR\_241604; XR\_241611; XR\_242359; XR\_242407; XR\_242480; XR\_244659; XR\_244755; XR\_245037; XR\_245646; XR\_246983; XR\_250613; XR\_251551; XR\_251682; XR\_252953; XR\_424060; XR\_424361; XR\_424475; XR\_425623; XR\_425926; XR\_426345; XR\_426478; XR\_426840; XR\_431240; XR\_432026; YPEL1; ZADH2; ZAK; ZBBX; ZBTB20; ZBTB43; ZC3H6; ZCWPW1; ZFHX2; ZFHX4; ZFP36L1; ZIC2; ZIC5; ZMAT1; ZMYND12; ZNF117; ZNF204P; ZNF365; ZNF575; ZNF658; ZNF703; ZNF81; ZSWIM4; ZSWIM5.



**Supplementary Table S3. List of 654 genes that had a significantly upregulated expression upon *PVT1* knockdown and of 510 genes that had a significantly downregulated expression upon *PVT1* knockdown in androgen treated LNCaP cells (+R1881).**

| <b>654 genes with a significantly <b>upregulated</b> expression upon <i>PVT1</i> knockdown in androgen treated LNCaP cells (+R1881)</b>                                                                                                                                                                                                                                                                                                                                                                                                                                                                                                                                                                                                                                                                                                                                                                                                                                                                                                                                                                                                                                                                                                                                                                                                                                                                                                                                                                                                                                                                                                                                                                                                                                                                                                                                                                                                                                                                                                                                                                                                                                                                                                                                                                                                                                                                                                                                                                                                                                                                                                                                                                                                                                                                                                                                                                                                                                                                                                                                                                                                                                                           |
|---------------------------------------------------------------------------------------------------------------------------------------------------------------------------------------------------------------------------------------------------------------------------------------------------------------------------------------------------------------------------------------------------------------------------------------------------------------------------------------------------------------------------------------------------------------------------------------------------------------------------------------------------------------------------------------------------------------------------------------------------------------------------------------------------------------------------------------------------------------------------------------------------------------------------------------------------------------------------------------------------------------------------------------------------------------------------------------------------------------------------------------------------------------------------------------------------------------------------------------------------------------------------------------------------------------------------------------------------------------------------------------------------------------------------------------------------------------------------------------------------------------------------------------------------------------------------------------------------------------------------------------------------------------------------------------------------------------------------------------------------------------------------------------------------------------------------------------------------------------------------------------------------------------------------------------------------------------------------------------------------------------------------------------------------------------------------------------------------------------------------------------------------------------------------------------------------------------------------------------------------------------------------------------------------------------------------------------------------------------------------------------------------------------------------------------------------------------------------------------------------------------------------------------------------------------------------------------------------------------------------------------------------------------------------------------------------------------------------------------------------------------------------------------------------------------------------------------------------------------------------------------------------------------------------------------------------------------------------------------------------------------------------------------------------------------------------------------------------------------------------------------------------------------------------------------------------|
| <p>A_33_P3223860; A_33_P3301876; A_33_P3345031; AC024560.2; ACRC; ACTA1; ADAM20P1; ADRB1; AEN; AK025118; AK096098; AK123926; AK127152; ALB; ANXA1; ANXA2R; AREG; ARL4A; ARRDC2; ASH1L-AS1; AURKAPS1; BBC3; BRD8; BRDT; BRI3; BTN3A1; BTN3A2; C1orf56; C2orf72; C2orf81; C4orf46; CARD9; CCNE2; CD3EAP; CD55; CDH26; CEACAM1; CEP135; CHAC1; CHRNA10; CLDN11; COX19; CTD-2292M16.8; CTXN1; CYP27A1; DCUN1D5; DDIAS; DHX58; DIEXF; DLX2; DNAAF3; DNHD1; DOK3; DTL; DTWD1; DUSP18; DYRK3; E2F7; ECM1; EFCAB3; EGR1; ENKUR; ERAP2; ESPL1; ESPNL; FAM155B; FAM187A; FAM209A; FAM46C; FAM71A; FAM81A; FAM84A; FAM87A; FAS; FAXDC2; FDXR; FGD3; FOXD4L5; FOXN4; FOXQ1; GADD45A; GATA6; GLS; GPRIN1; GPX8; GRM2; GSG2; GUCY1B2; HCLS1; HRK; IDI2-AS1; IER5; IFFO1; IFIT1; IL20RB; IQCD; IRS1; KCNIP2-AS1; KCNJ14; KIAA0408; KIAA1462; KIF2C; KLHL31; LAMB2P1; LIF; LINC00324; LINC00476; LINC01311; LINC01410; LMO2; lnc-AK5-1:1; lnc-AP000769.1-1:1; lnc-CERK-1:1; lnc-DCTD-1:1; lnc-DKK4-1:1; lnc-FAM72C-2:1; lnc-FAM98A-1:1; lnc-IDE-1:1; lnc-MATN2-2:1; lnc-MMRN1-2:1; lnc-MMRN1-2:2; lnc-MMRN1-2:5; lnc-NDST2-3:1; lnc-NT5DC3-1:1; lnc-OBFC2A-1:1; lnc-PITPNC1-1:1; lnc-PPM1D-1:1; lnc-RPL7L1-1:1; lnc-SEPT7L-1:1; lnc-SERPINC1-1:24; lnc-SLC39A8-1:1; lnc-SRBD1-1:1; lnc-TAF15-1:1; lnc-WNT1-2:1; lnc-WRAP73-1:1; LOC100506804; MCM10; MDM2; MESDC1; MIA; MORF4L2-AS1; MPZL2; MRM1; MS4A8; MTFR2; MTHFD2; MYB; NAB2; NABP1; NOV; NR2F1; ORC6; PAX1; PAX2; PDE4A; PDE4D; PDE4DIP; PGF; PHLDA1; PHLDA3; PIM2; PLAC8L1; PLK3; PMAIP1; PMP22; PPP1R27; PRKAG2-AS1; PTGES2-AS1; PTGFR; RASL11B; RBM26-AS1; REM2; RHBDF2; RHEBL1; RIN1; RNF19B; RP11-318C24.2; RP11-344N10.5; RP11-395G23.3; RP11-621L6.3; RPA4; RPRML; RRN3P2; SBSN; SCARNA8; SKA1; SLC18B1; SLC25A19; SLC25A36; SLC29A1; SLC7A2; SNHG1; SNHG12; SNORA26; SNORA3B; SNORA8; SNORD103A; SNORD21; SNORD43; SNORD47; SNORD84; SNORD86; SOGA3; SPG7; SPRY1; STC2; TBX2; TCONS_12_00009373; TCONS_12_00020648; TFAP2A-AS1; THC2667604; THC2724751; TICRR; TIGAR; TLR3; TMED6; TMEM243; TNFSF10; TNFSF9; TOR4A; TSPAN12; TTR; UBAP2; UHRF1; WDR66; XR_241982; ZC3H12C; ZFP36L2; ZGLP1; ZNF124; ZNF215; ZNF436-AS1; A_21_P0014946; A_32_P88905; A_33_P3218504; A_33_P3334043; A_33_P3346526; A_33_P3404759; A_33_P3424347; ABT1; AC092620.3; AC093382.1; AC108488.4; ACKR3; ACTA2; ADH1C; ADM; AGBL5-AS1; AJUBA; AK093004; AK095428; AK095971; AK096487; AK096649; AK097098; AK098491; AK123449; AK124361; AK126805; AK289844; AK294208; AMIGO3; AMOTL2; ANG; ANKRD16; ANKRD34A; ANKRD50; ANP32E; AQP10; ARHGAP32; ARL4D; ARMCX6; ASB13; ASNSP1; ASPM; AY129018; BAX; BBS12; BC029571; BC050402; BEX5; BF515046; BI056255; BIRC3; BMF; BRIP1; BTG2; C10orf10; C11orf95; C12orf66; C4orf47; C8orf48; CAPN10-AS1; CARD8; CBLN2; CBR3; CCDC103; CCDC34; CCNO; CD83; CDADC1; CDH24; CDKL1; CDKN1A; CEP120; CEP152; CEP162; CERK; CHKB-AS1; CHML; CLCN5; CLDN23; CLPTM1; CNKSR3; COLCA1; COLGALT1; CRYGS; CSRNP2; CTD-2319I12.4; CUZD1; CYP2J2; DAND5; DCLRE1B; DDX11L16; DESI2; DNAH11; DNMT3A; DRAIC; DRAM1; DSC1; DSC2; DUSP4; DYRK2; EEF1DP3; EID2B; EMC3-AS1; ENC1; ENST00000621052; ENST00000623723; ERICH2; ETS2; EXPH5; F2R; FAM155A-IT1;</p> |

FAM177A1; FAM198B; FAM212B; FAM217B; FAM229B; FAM50B; FGD6; FIGN; FOS; FOXD3; FOXO4; FOXO6; FRMD4B; FSCN1; FSD1L; FZD7; FZD8; GDPGP1; GEMIN2; GIGYF1; GIMAP2; GIT1; GJB2; GJC1; GNPDA1; GPAT3; GRHL3; HACD1; HAGLROS; HAS3; HAUS6; HEG1; HES6; HMBOX1; HMOX1; HNRNPLL; HOXA11-AS; HOXA7; HOXA9; HOXB5; HOXB6; HSD17B6; IFI44; IFIT2; IFIT5; IFITM1; IGSF9; IKBIP; ING1; IRF1; IRX2; IRX3; IRX5; ITPRIP; KB-1460A1.5; KCNS3; KDM6B; KDSR; KIAA0040; KIAA1841; KIF23; KIF25; KIFC1; KITLG; KLF6; KLHL24; KLLN; LFNG; LGI2; LIN9; LINC00662; LINC01011; LINC01089; LINC01315; LMO4; lnc-AL035696.1-5:1; lnc-APOC3-2:1; lnc-C11orf1-1:1; lnc-C17orf62-2:1; lnc-C21orf58-1:1; lnc-C2orf78-1:1; lnc-C6orf192-1:1; lnc-C9orf103-3:1; lnc-C9orf80-1:2; lnc-CCKAR-1:1; lnc-CENPP-1:1; lnc-CLK4-1:1; lnc-COPZ2-1:2; lnc-DNAJC11-1:1; lnc-EIF2D-1:1; lnc-ERP44-3:3; lnc-EYS-2:1; lnc-FAM46D-1:1; lnc-GNS-2:1; lnc-HCRTR1-1:1; lnc-INTS8-1:1; lnc-INTS9-1:3; lnc-IRX3-4:5; lnc-KBTBD6-1:1; lnc-MAPK8IP2-1:12; lnc-MAPK8IP2-1:5; lnc-MCCC2-2:2; lnc-MMRN1-2:6; lnc-MTA2-1:1; lnc-NME4-1:2; lnc-OBFC1-2:2; lnc-OIT3-2:1; lnc-OTOGL-1:1; lnc-PHF3-1:1; lnc-PLEKHA5-1:1; lnc-PRKRIR-1:2; lnc-RALGDS-2:1; lnc-RHOJ-1:1; lnc-RNF125-2:1; lnc-RPLP1-1:14; lnc-RPLP1-1:15; lnc-RPP30-2:1; lnc-RSBN1L-1:1; lnc-SEH1L-1:1; lnc-SEMA6C-1:1; lnc-SFN-1:1; lnc-SOX6-1:1; lnc-SPIRE2-1:1; lnc-TCF19-1:4; lnc-TCL1B-2:1; lnc-TDRD5-1:1; lnc-TTR-1:1; lnc-UQCRFS1-7:1; lnc-ZNF717-1:1; lnc-ZNF74-1:5; lnc-ZSCAN10-3:4; LOC100270804; LOC100288911; LOC100506127; LOC100506302; LOC101929516; LOC388692; LOC399815; LOC400958; LPCAT4; LRIG3; LRP11; LSM3; LTF; MAFB; MAP3K8; MAP7D3; MCM4; MCM9; MEX3B; MNX1; MYO1B; NAA38; NCOA7; NDC1; NEAT1; NEMP1; NET1; NEURL3; NFKBID; NIPAL1; NM\_001099435; NR\_024011; NR1D1; NR3C1; NRARP; NREP; NRG4; NT5DC3; NUAKE2; OAF; ORC1; OSR2; P2RX7; PABPC5; PAG1; PAN3-AS1; PANX1; PDLIM3; PELI1; PER2; PGM2L1; PLEKHO1; PLK2; POGLUT1; POLR3G; PRDM12; PRPF4; PSAT1; PSAT1P1; PSAT1P3; PTCH1; RAB30-AS1; RAP2B; RASIP1; RASSF2; RASSF5; RAVER1; RBM38; RBM43; RDM1; RIPK1; RMI2; RNF125; RNF144B; RNF146; RP11-1007O24.2; RP11-1055B8.4; RP11-150O12.3; RP11-18H7.1; RP11-206L10.9; RP11-227G15.8; RP11-253M7.4; RP11-304L19.12; RP11-363J20.1; RP11-45M22.5; RP11-486G15.2; RP11-57A19.2; RP11-705O1.8; RP13-516M14.1; RTN3; SAV1; SCARNA23; SCGB1D2; SERPINB5; SERPINC1; SESN2; SF3B4; SH3BGRL2; SIX1; SIX4; SLC22A10; SMC6; SNHG21; SNHG4; SNORA61; SOCS1; SOWAHD; SOX8; SPATA41; SPOCK2; SPRED3; ST8SIA4; STIM2; STK38; TAF5L; TAP1; TBX2-AS1; TCONS\_12\_00006779; TCONS\_12\_00006780; TCONS\_12\_00011380; TCONS\_12\_00013803; TCONS\_12\_00014848; TCONS\_12\_00017138; TCONS\_12\_00020645; TCONS\_12\_00020647; TCONS\_12\_00029338; TCONS\_12\_00029343; TERF2; TGFB1; TGIF1; THC2601170; THC2674845; TIGD3; TLE1; TNFRSF21; TOR1B; TP53; TPM3; TPTE; TRAF5; TRIB1; TRIM2; TRIM45; TSNAXIP1; TUBBP5; TYMS; TYMSOS; ULBP1; UNC93B1; UQCRB; USP27X; VASH1; VIM-AS1; WEE1; XM\_005255122; XR\_108380; XR\_109753; XR\_243166; XR\_424187; XR\_424475; XR\_425268; XR\_426337; ZAR1L; ZBTB26; ZFP14; ZNF219; ZNF28; ZNF383; ZNF404; ZNF425; ZNF585A; ZNF713; ZNF79; ZNF845; ZNF850; ZNF878; ZPLD1; ZSCAN12; ZSCAN16-AS1

**510 genes with a significantly [downregulated](#) expression by *PVT1* knockdown in androgen treated LNCaP cells (+R1881).**

AC093642.3; ACPD; ADAL; ADCY1; ADGRV1; AF131217.1; AK125979; AL035610.2; ALG14; ANK3; ANKIB1; ANTXR1; AP000473.5; APBA2; ARHGAP29; ARHGAP35;

ARHGAP6; ARHGEF10; ARL8B; ARNT2; ASAP1; ATHL1; ATP2C2; ATXN7L1; AUH; B9D1; BMP6; BTBD9; C11orf80; C5orf28; C8orf37-AS1; CA5BP1; CAB39; CASC4; CCDC88C; CDKAL1; CGNL1; CHMP3; COA1; COMMD1; CRADD; CREBL2; CRYBG3; CSPP1; CUX1; DAPK2; DCAF6; DGCR5; DIAPH2; DIAPH3; DISC1; DLEU1; DOCK1; DOCK4; EFR3A; EIF2AK2; ENST00000612111; EPHA3; EPHB2; ERI3; EXOC4; EXOC7; FAM118A; FAM171A1; FAR2P1; FARP2; FBXL17; FGF13; FGFRL1; FHOD3; FMO4; FOXN3; GALNT10; GALNT16; GFOD1; GLB1L; GMDS; GMDS-AS1; GOLGA8A; GPATCH2; GPC6; GRIK2; GYG2P1; HDAC8; HIVEP3; HOOK1; HS6ST2; ICA1; IMM2P2L; INPP4A; INPP5A; JAZF1; KALRN; KCND2; KCNMA1; KDM4B; KDM4C; KIAA0556; KIF13B; LINC00858; LINC00882; LINC01029; LMBR1; lnc-C20orf197-3:13; lnc-EXOC4-1:1; lnc-EXOC4-2:1; lnc-MAGEB10-2:1; lnc-MBL2-2:3; lnc-WRNIP1-2:35; lnc-WRNIP1-2:9; lnc-ZBBX-3:1; LOC100288798; LOC100507291; LOC101927056; LOC101927282; LOC339862; LOC728730; LRRC40; LRRN3; MAP2K4; MAP2K5; MED27; MFF; MIR99AHG; MKL1; MPP6; MSI2; MSRA; MYLK; NAALADL2; NEFH; NLGN1; NLGN4Y; NM\_005042; NRXN1; NSMAF; PBX1; PCCA; PDK3; PDPK1; PDSS2; PDZRN3; PIK3CB; PKNOX2; PLCB4; POLA1; Poted; POTEI; PPARA; PPARG; PPM1H; PPP2R2C; PRKCE; PRUNE2; PSMF1; PTPRG; PVT1; RABGAP1; RABGAP1L; RALGPS1; RALYL; RANBP3L; RAPGEF1; ROR1; RP11-122G18.5; RP11-266A24.1; RP11-38M15.11; RPS6KA3; RPS6KA5; RPTOR; RSRC1; RTN4RL1; SBF2; SCFD2; SEMA4F; SEPT11; SESTD1; SETD3; SH3PXD2A; SHANK2; SIL1; SLC24A1; SLC24A3; SMYD3; SNX14; SNX29; SRP14-AS1; SRRM1; SRRM2-AS1; ST3GAL3; STAG2; STK32C; STK33; STYK1; SUSD4; TARSL2; TBC1D22A; TBL1X; TCF4; TCONS\_12\_00001492; TCONS\_12\_00017189; TCONS\_12\_00025015; TENM1; TENM2; TLL1; TMEM222; TMEM242; TMEM266; TMTC2; TNFSF4; TTC28; TTC7B; TYRP1; UBAC2; UBE2E2; USP25; USP31; VAC14; WDR11; WDR7; WNT7B; WWC1; XR\_110931; XR\_426478; XR\_430630; YPEL1; ZBBX; ZBTB20; ZDHHC14; ZFAND3; ZFYVE28; ZNF385B; A\_21\_P0013943; AC133680.1; ACRV1; ACTN1; ACYP2; ADGRG6; AFF3; AK022088; AK128032; AK130248; AK130387; AK5; AK8; ALCAM; ANKRD20A11P; ANKRD37; AP4S1; APBA1; ARFGF2; ARHGAP27; ARHGAP28; ARHGAP44; ARHGEF10L; ARHGEF16; ARID1B; ATE1; ATF7; ATG4A; ATP6V0E2-AS1; BC029857; BQ082135; C10orf76; C16orf72; C1orf21; CACNA1H; CAMK2B; CASZ1; CCDC138; CCDC146; CCDC183; CCDC50; CCDC53; CCDC90B; CD99L2; CDC14B; CEP44; CERS6; CHST11; COL27A1; COL4A5; COL4A6; COLEC12; COX7B2; CPAMD8; CPLX3; CPNE7; CPSF1; CREB3L4; CTC-228N24.3; CTD-2384A14.2; CYP4F30P; DCLK2; DENND1A; DENND5B; DEPDC1B; DHRS2; DHX36; DHX37; DIS3L; DISP2; DNAJB12; DNAJC1; DNASE2B; DNTTIP2; DOCK5; DYM; EAF2; EDA; EFNA5; EHMT1; EIF2B3; EIF3H; ENOX1; ENST00000624918; ENTPD5; EVI5; FAM172A; FAM189A1; FAM221A; FAR2P2; FBXO25; FGGY; FMR1NB; FTO; GABPB1; GALNT18; GATS; GNAZ; GOLGA4; GOLGA6A; GOLGA8R; GPR158; GULP1; HHAT; HIF1A; HIPK2; HLCS; HUWE1; IFT140; IGF1R; IL1RAPL1; IRAK1; ITGA9-AS1; KATNAL2; KCNC2; KCNH8; KDM6A; KIAA0355; KIAA1328; KLHL29; KTN1; LA16c-380H5.4; LAMA3; LARP4B; LIN7A; LINC01372; lnc-BAI1-1:1; lnc-FMOD-2:1; lnc-FSIP1-1:1; lnc-MAT2B-3:8; lnc-MIPOL1-2:1; lnc-MIPOL1-4:1; lnc-MYC-2:22; lnc-NLGN1-1:6; lnc-OSBPL9-1:1; lnc-RP3-377D14.1.1-4:1; lnc-SMCR7L-1:1; lnc-SNURF-1:1; lnc-SREK1-2:1; lnc-WRNIP1-2:20; LOC102723927; LOC284930; LOC286437; LOC440910; LPP; LRIG1; LRP8; LRRC20; LTA4H; LUZP2; M6PR; MAML3; MBOAT2; MCTP2; MGAT5; MGC39584; MICAL3; MMP11; MOCOS; MUC4; NCK1-AS1; NEBL; NEK11; NFATC1; NINL; NLGN4X; NME3; NOSTRIN; NPDC1; NPRL3; NRP1; NTNG1; OBSCN; OLA1; OR8A1; OTUD7A; P3H2; PAXBP1-AS1; PEBP4; PI4KA; PI4KAP2; PIGK; PIR; PKN2; PLCB1; POLR1A; POTE3; POTE4; PRKACB; PRKCH; PRR4; PTPN14;

PTPN21; PTPRM; PTPRN2; PUDP; RALY; RARB; RBKS; REXO2; RFX2; RP11-1038A11.1; RP11-30J20.1; RP11-323I15.2; RP11-476K15.1; RP11-624L4.1; RP11-738O11.9; RP1-65J11.1; RP1-90G24.6; RP4-742C19.12; RXRA; SAMD12; SAP130; SCHLAP1; SENP7; SEPT9; SERGEF; SETBP1; SGMS1; SLC13A3; SLC22A18; SLC22A23; SLC25A21; SLC26A10; SMOC2; SMU1; SPIDR; SPIRE2; SRGAP2; ST3GAL5; ST7; STK39; SYT7; TANGO2; TBC1D1; TBL1Y; TCONS\_12\_00000562; TCONS\_12\_00001494; TCONS\_12\_00017422; TECPR1; TFPI; TG; THBS3; THC2616237; THRB; THSD7A; TMEM229B; TMEM241; TOM1L2; TPT1-AS1; TRAPPC9; TRIM48; TRIM49D1; TRIM53AP; TSHZ3; TTC12; TTC6; U2AF1; UBE4A; UMAD1; VPS37B; VTI1A; XIAP; XM\_006720346; XR\_241611; XR\_424539; YPEL2; ZACN; ZC3H3; ZC4H2; ZDBF2; ZFHX3; ZHX2; ZMIZ1; ZMYM4; ZNF146; ZNF585B; ZNF652

**Supplementary Table S4. List of genes with a significant change in the expression level upon *PVT1* knockdown in hormone-deprived cells (-R1881), of which 396 were upregulated and 436 downregulated, compared with their expression in control cells treated with a scrambled GapmeR oligonucleotide (CTRL KD).**

| <b>396 genes with a significantly <b>upregulated</b> expression upon <i>PVT1</i> knockdown in hormone-deprived LNCaP cells (-R1881)</b>                                                                                                                                                                                                                                                                                                                                                                                                                                                                                                                                                                                                                                                                                                                                                                                                                                                                                                                                                                                                                                                                                                                                                                                                                                                                                                                                                                                                                                                                                                                                                                                                                                                                                                                                                                                                                                                                                                                                                                                                                                                                                                                                                                                                                                                                                                                                                                                                                                                                                                                                                                                                                                                                                                                                                                                                                                                                                                                                                                        |
|----------------------------------------------------------------------------------------------------------------------------------------------------------------------------------------------------------------------------------------------------------------------------------------------------------------------------------------------------------------------------------------------------------------------------------------------------------------------------------------------------------------------------------------------------------------------------------------------------------------------------------------------------------------------------------------------------------------------------------------------------------------------------------------------------------------------------------------------------------------------------------------------------------------------------------------------------------------------------------------------------------------------------------------------------------------------------------------------------------------------------------------------------------------------------------------------------------------------------------------------------------------------------------------------------------------------------------------------------------------------------------------------------------------------------------------------------------------------------------------------------------------------------------------------------------------------------------------------------------------------------------------------------------------------------------------------------------------------------------------------------------------------------------------------------------------------------------------------------------------------------------------------------------------------------------------------------------------------------------------------------------------------------------------------------------------------------------------------------------------------------------------------------------------------------------------------------------------------------------------------------------------------------------------------------------------------------------------------------------------------------------------------------------------------------------------------------------------------------------------------------------------------------------------------------------------------------------------------------------------------------------------------------------------------------------------------------------------------------------------------------------------------------------------------------------------------------------------------------------------------------------------------------------------------------------------------------------------------------------------------------------------------------------------------------------------------------------------------------------------|
| <p>A_21_P0014692; A_21_P0014749; A_33_P3300117; A_33_P3367970; A_33_P3484775; AC084809.3; AC087491.2; AK022341; AK055942; AK123993; ALKBH8; AMER1; AOC2; APOE; BC008289; BC110990; BREA2; BZW2; C18orf54; C8G; CCDC177; CDC42EP2; CDK2; CXCR4; DSG1-AS1; EBPL; EID3; ENKD1; ENST00000614063; ERVMER34-1; EXO1; FAHD2A; FJX1; FOXN2; FRMD8; GABPB1-AS1; GAN; GAPLINC; GNRH1; GP1BB; GPR75; HAPLN3; HES7; HIST1H4J; HIST1H4K; HIST2H3A; HSPB2; ICOSLG; IFI6; IGF2BP1; IGFBP5; IHH; IP6K2; ITGA10; KIF18A; KLF4; KLHL11; LINC01167; lnc-ANKH-1:3; lnc-ASH2L-1:1; lnc-CPN2-3:1; lnc-EIF2AK4-4:1; lnc-EIF4EBP1-1:1; lnc-FAM3A-1:1; lnc-GATAD1-2:2; lnc-HLA-DMA-1:1; lnc-NDFIP1-1:1; lnc-PDE2A-1:1; lnc-SNX33-1:1; LOC101927482; LOC101928891; LRRC73; MARVELD1; MDM1; METTL1; MFSD2A; MIR17HG; MSL1; MTMR11; MYBPHL; NAA35; NACC2; NOP56; NR2C2AP; PCDH20; PFKFB2; PIDD1; PNP; POLR1C; PPM1D; PPRC1; PRR22; PSPN; PTGER4; RAB36; RASL11A; RDH10; RDX; RECQL4; RGS16; RNF112; RNU6ATAC; RP11-1275H24.1; RP11-159D12.2; RP11-359M6.3; RP11-655M14.13; RP4-564F22.5; RPL32; SCARF2; SCARNA11; SCARNA14; SCARNA18; SCARNA3; SGK223; SGOL1; SKIL; SLC17A4; SLC1A3; SNHG15; SNHG17; SNORA13; SNORA14B; SNORA2A; SNORA30; SNORA36B; SNORA38; SNORA40; SNORA41; SNORA44; SNORA46; SNORA50C; SNORA57; SNORA5A; SNORA5B; SNORA63; SNORA65; SNORA68; SNORA74B; SNORA79; SNORA80A; SNORA80B; SNORA84; SNORD104; SNORD62A; SNORD64; SNORD76; SNORD99; SPEF1; STX2; TCL1B; TCONS_12_00000969; TCONS_12_00006103; TCONS_12_00019714; TCP10L; TFF1; TGM1; THC2756939; TPM2; VTRNA1-2; VTRNA1-3; VWCE; ZMYND10; ZNF169; ZNF577; A_33_P3223860; A_33_P3301876; A_33_P3345031; AC024560.2; ACRC; ACTA1; ADAM20P1; ADRB1; AEN; AK025118; AK096098; AK123926; AK127152; ALB; ANXA1; ANXA2R; AREG; ARL4A; ARRDC2; ASH1L-AS1; AURKAPS1; BBC3; BRD8; BRDT; BRI3; BTN3A1; BTN3A2; C1orf56; C2orf72; C2orf81; C4orf46; CARD9; CCNE2; CD3EAP; CD55; CDH26; CEACAM1; CEP135; CHAC1; CHRNA10; CLDN11; COX19; CTD-2292M16.8; CTXN1; CYP27A1; DCUN1D5; DDIAS; DHX58; DIEXF; DLX2; DNAAF3; DNHD1; DOK3; DTL; DTWD1; DUSP18; DYRK3; E2F7; ECM1; EFCAB3; EGR1; ENKUR; ERAP2; ESPL1; ESPNL; FAM155B; FAM187A; FAM209A; FAM46C; FAM71A; FAM81A; FAM84A; FAM87A; FAS; FAXDC2; FDXR; FGD3; FOXD4L5; FOXN4; FOXQ1; GADD45A; GATA6; GLS; GPRIN1; GPX8; GRM2; GSG2; GUCY1B2; HCLS1; HRK; IDI2-AS1; IER5; IFFO1; IFIT1; IL20RB; IQCD; IRS1; KCNIP2-AS1; KCNJ14; KIAA0408; KIAA1462; KIF2C; KLHL31; LAMB2P1; LIF; LINC00324; LINC00476; LINC01311; LINC01410; LMO2; lnc-AK5-1:1; lnc-AP000769.1-1:1; lnc-CERK-1:1; lnc-DCTD-1:1; lnc-DKK4-1:1; lnc-FAM72C-2:1; lnc-FAM98A-1:1; lnc-IDE-1:1; lnc-MATN2-2:1; lnc-MMRN1-2:1; lnc-MMRN1-2:2; lnc-MMRN1-2:5; lnc-NDST2-3:1; lnc-NT5DC3-1:1; lnc-OBFC2A-1:1; lnc-PITPNC1-1:1; lnc-PPM1D-1:1; lnc-RPL7L1-1:1; lnc-SEPT7L-1:1; lnc-SERPINC1-1:24; lnc-SLC39A8-1:1; lnc-SRBD1-1:1; lnc-TAF15-1:1; lnc-WNT1-2:1; lnc-WRAP73-1:1; LOC100506804; MCM10; MDM2; MESDC1; MIA; MORF4L2-AS1; MPZL2; MRM1; MS4A8; MTRF2; MTHFD2; MYB; NAB2; NABP1; NOV; NR2F1; ORC6; PAX1; PAX2; PDE4A; PDE4D; PDE4DIP; PGF; PHLDA1; PHLDA3;</p> |

PIM2; PLAC8L1; PLK3; PMAIP1; PMP22; PPP1R27; PRKAG2-AS1; PTGES2-AS1; PTGFR; RASL11B; RBM26-AS1; REM2; RHBDF2; RHEBL1; RIN1; RNF19B; RP11-318C24.2; RP11-344N10.5; RP11-395G23.3; RP11-621L6.3; RPA4; RPRML; RRN3P2; SBSN; SCARNA8; SKA1; SLC18B1; SLC25A19; SLC25A36; SLC29A1; SLC7A2; SNHG1; SNHG12; SNORA26; SNORA3B; SNORA8; SNORD103A; SNORD21; SNORD43; SNORD47; SNORD84; SNORD86; SOGA3; SPG7; SPRY1; STC2; TBX2; TCONS\_12\_00009373; TCONS\_12\_00020648; TFAP2A-AS1; THC2667604; THC2724751; TICRR; TIGAR; TLR3; TMED6; TMEM243; TNFSF10; TNFSF9; TOR4A; TSPAN12; TTR; UBAP2; UHRF1; WDR66; XR\_241982; ZC3H12C; ZFP36L2; ZGLP1; ZNF124; ZNF215; ZNF436-AS1

**436 genes with a significantly *downregulated* expression by *PVT1* knockdown in hormone-deprived LNCaP cells (-R1881).**

A\_21\_P0014213; A\_33\_P3222600; AC010967.2; AC098973.2; ACAT1; ACER3; ACTN3; ADAMTS17; ADD1; AFF1; AGAP1; AIDA; AK123308; AK130873; AL117431; AMN1; ANKRD20A12P; ANKRD20A2; ANKRD44; ANXA6; APMAP; ARL15; ARMC9; ASAP2; ASTN2; ATP9B; BCAS1; BCAS3; BLMH; C1orf95; CA12; CAMKMT; CFAP44; CHCHD3; CNBD1; COLQ; CTD-2001C12.1; CTD-2151A2.1; CTPS2; CUEDC1; DDO; DENND1B; DEPTOR; DIO3; DIS3L2; DPP4; DSCR3; EEF1A1; EEFSEC; EML5; ERC1; ERCC6L2; ERGIC1; ERMAP; FAM3B; FARP1; FBLN7; FBXL7; FER; FOXO4; FRMD5; FRMPD2; FZD6; GALNT11; GAS6; GBA3; GOLGA6L4; GOLGA6L9; GOLGA8J; GPA33; GRIK1; GRK5; GUCD1; HIRA; HIST2H2BE; INADL; ITPK1; ITPR1; KCNAB2; KCNK13; KCNU1; KDM5B; KIAA1033; KIAA1217; KLHL13; LACE1; LARGE; LHPP; LINC00565; LINC01006; LINC01354; LINGO3; lnc-ADAM30-1:1; lnc-ARID2-3:1; lnc-C11orf39-3:1; lnc-C17orf46-1:1; lnc-HIATL1-1:1; lnc-PEX2-3:1; lnc-PLCD1-1:6; lnc-TRAP1-1:1; lnc-TRH-2:1; lnc-WDR7-6:1; LOC100130587; LOC101929633; LOC401052; LOC553103; LRP1; LRRC42; LYPD6B; MAGI1; MAPK10; MATN2; MBD5; MECOM; MEGF8; MFN2; MFSD8; NACAD; NAP1L4; NCAPG2; NDRG3; NEU4; NIPAL3; NIPSNAP3B; NRG3; NXN; OPRK1; OSBP2; OTUD5; PALLD; PANK3; PITPNM3; PKIB; PLA2G4F; PLCG2; PLEKHB2; PLXDC2; PPF1A1; PPIP5K1; PTK2; PTPN13; PTPRR; RAP2C-AS1; ROR2; RP11-166P13.3; RP11-305L7.1; RP11-319F12.2; RP11-379B8.1; RP11-452F19.3; RP11-456O19.2; RP11-548L20.1; RP11-666A20.4; RP11-723O4.6; RPS6KA2; RRBP1; RTN1; RYR2; SDC3; SEC23A; SECISBP2; SHISA3; SHROOM2; SLC16A7; SLC38A6; SLCO5A1; SMARCB1; SMPDL3A; SNAP47; SNRK; SORBS2; SPG11; SSH1; STAG3L4; STIM1; STX18-AS1; STXBP4; STYXL1; SYT17; TCONS\_12\_00012688; TCONS\_12\_00016154; TCONS\_12\_00018853; TCONS\_12\_00018976; TGM3; TJP2; TMEM210; TMEM245; TNIK; TPK1; TRAM2; TRMT2B; TSPAN9; TXNRD2; TYW1; VPS13A; WNK2; XR\_242359; XR\_242407; XR\_246983; XR\_425926; XR\_428452; XR\_431240; ZAK; ZBED3-AS1; ZMAT1; AC093642.3; ACPP; ADAL; ADCY1; ADGRV1; AF131217.1; AK125979; AL035610.2; ALG14; ANK3; ANKIB1; ANTXR1; AP000473.5; APBA2; ARHGAP29; ARHGAP35; ARHGAP6; ARHGEF10; ARL8B; ARNT2; ASAP1; ATHL1; ATP2C2; ATXN7L1; AUH; B9D1; BMP6; BTBD9; C11orf80; C5orf28; C8orf37-AS1; CA5BP1; CAB39; CASC4; CCDC88C; CDKAL1; CGNL1; CHMP3; COA1; COMMD1; CRADD; CREBL2; CRYBG3; CSPP1; CUX1; DAPK2; DCAF6; DGCR5; DIAPH2; DIAPH3; DISC1; DLEU1; DOCK1; DOCK4; EFR3A; EIF2AK2; ENST00000612111; EPHA3; EPHB2; ERI3; EXOC4; EXOC7; FAM118A; FAM171A1; FAR2P1; FARP2; FBXL17; FGF13; FGFRL1; FHOD3; FMO4; FOXN3; GALNT10; GALNT16; GFOD1; GLB1L; GMDS; GMDS-AS1;

GOLGA8A; GPATCH2; GPC6; GRIK2; GYG2P1; HDAC8; HIVEP3; HOOK1; HS6ST2; ICA1; IMMP2L; INPP4A; INPP5A; JAZF1; KALRN; KCND2; KCNMA1; KDM4B; KDM4C; KIAA0556; KIF13B; LINC00858; LINC00882; LINC01029; LMBR1; lnc-C20orf197-3:13; lnc-EXOC4-1:1; lnc-EXOC4-2:1; lnc-MAGEB10-2:1; lnc-MBL2-2:3; lnc-WRNIP1-2:35; lnc-WRNIP1-2:9; lnc-ZBBX-3:1; LOC100288798; LOC100507291; LOC101927056; LOC101927282; LOC339862; LOC728730; LRRC40; LRRN3; MAP2K4; MAP2K5; MED27; MFF; MIR99AHG; MKL1; MPP6; MSI2; MSRA; MYLK; NAALADL2; NEFH; NLGN1; NLGN4Y; NM\_005042; NRXN1; NSMAF; PBX1; PCCA; PDK3; PDPK1; PDSS2; PDZRN3; PIK3CB; PKNOX2; PLCB4; POLA1; POTED; POTEI; PPARA; PPARG; PPM1H; PPP2R2C; PRKCE; PRUNE2; PSMF1; PTPRG; PVT1; RABGAP1; RABGAP1L; RALGPS1; RALYL; RANBP3L; RAPGEF1; ROR1; RP11-122G18.5; RP11-266A24.1; RP11-38M15.11; RPS6KA3; RPS6KA5; RPTOR; RSRC1; RTN4RL1; SBF2; SCFD2; SEMA4F; SEPT11; SESTD1; SETD3; SH3PXD2A; SHANK2; SIL1; SLC24A1; SLC24A3; SMYD3; SNX14; SNX29; SRP14-AS1; SRRM1; SRRM2-AS1; ST3GAL3; STAG2; STK32C; STK33; STYK1; SUSD4; TARSL2; TBC1D22A; TBL1X; TCF4; TCONS\_12\_00001492; TCONS\_12\_00017189; TCONS\_12\_00025015; TENM1; TENM2; TLL1; TMEM222; TMEM242; TMEM266; TMTC2; TNFSF4; TTC28; TTC7B; TYRP1; UBAC2; UBE2E2; USP25; USP31; VAC14; WDR11; WDR7; WNT7B; WWC1; XR\_110931; XR\_426478; XR\_430630; YPEL1; ZBBX; ZBTB20; ZDHHC14; ZFAND3; ZFYVE28; ZNF385B

**Supplementary Table S5. List of 160 genes in LNCaP cells with expression significantly downregulated by androgen stimulation in the presence of endogenous levels of *PVT1* and with their expression upregulated upon *PVT1* knockdown in androgen treated cells, plus the list of TCGA-PRAD gene IDs for 121 of these genes.**

| <b>160 genes with expression significantly downregulated by androgen, which became upregulated upon <i>PVT1</i> knockdown</b>                                                                                                                                                                                                                                                                                                                                                                                                                                                                                                                                                                                                                                                                                                                                                                                                                                                                                                                                                                                                                                                                                                                                                                                                                                                                                                                 |
|-----------------------------------------------------------------------------------------------------------------------------------------------------------------------------------------------------------------------------------------------------------------------------------------------------------------------------------------------------------------------------------------------------------------------------------------------------------------------------------------------------------------------------------------------------------------------------------------------------------------------------------------------------------------------------------------------------------------------------------------------------------------------------------------------------------------------------------------------------------------------------------------------------------------------------------------------------------------------------------------------------------------------------------------------------------------------------------------------------------------------------------------------------------------------------------------------------------------------------------------------------------------------------------------------------------------------------------------------------------------------------------------------------------------------------------------------|
| C4orf46; CCNE2; CDH26; CHAC1; FAS; FGD3; FOXN4; FOXQ1; GATA6; GPX8; GUCY1B2; HRK; IER5; KIAA0408; KIAA1462; LIF; LINC00476; lnc-FAM72C-2:1; lnc-SRBD1-1:1; MYB; NABP1; NOV; PAX1; PDE4D; PDE4DIP; PMP22; PRKAG2-AS1; RASL11B; SLC18B1; SLC7A2; SOGA3; TCONS_12_00020648; TFAP2A-AS1; TSPAN12; A_33_P3346526; ACKR3; ACTA2; ADM; AGBL5-AS1; AJUBA; AK124361; AMIGO3; ANKRD16; ANP32E; ARHGAP32; ARL4D; ASB13; ASNBP1; BIRC3; BMF; C10orf10; CBLN2; CBR3; CCNO; CD83; CERK; CLCN5; CNKSR3; COLCA1; DAND5; DDX11L16; DNAH11; DRAIC; DSC2; ENC1; ENST00000623723; EXPH5; F2R; FAM198B; FAM212B; FAM217B; FAM229B; FGD6; FOXD3; FOXO4; FOXO6; FSCN1; GIMAP2; GJB2; GPAT3; HAGLROS; HEG1; HOXA11-AS; HOXA7; HOXA9; HOXB5; HOXB6; IFIT2; IFIT5; IFITM1; IRF1; IRX3; IRX5; KCNS3; KIF25; KITLG; KLHL24; KLLN; LFNG; lnc-CCKAR-1:1; lnc-EYS-2:1; lnc-INTS8-1:1; lnc-INTS9-1:3; lnc-IRX3-4:5; lnc-OIT3-2:1; lnc-PHF3-1:1; lnc-RPLP1-1:14; lnc-RPLP1-1:15; lnc-ZNF74-1:5; LOC100288911; LOC400958; LPCAT4; LRIG3; LTF; MAP3K8; MEX3B; MNX1; NCOA7; NET1; NEURL3; NIPAL1; NR_024011; NR3C1; NREP; NUAK2; OSR2; P2RX7; PABPC5; PAG1; PAN3-AS1; PDLIM3; PGM2L1; PRDM12; PSAT1; PSAT1P1; PSAT1P3; RAP2B; RASSF2; RASSF5; RDM1; RNF125; RNF144B; RP11-253M7.4; RP11-45M22.5; RP11-57A19.2; SCGB1D2; SERPINB5; SH3BGRL2; SLC22A10; SMC6; ST8SIA4; TCONS_12_00017138; TCONS_12_00029343; THC2601170; TLE1; TNFRSF21; TRIB1; TRIM2; TRIM45; XR_424475            |
| <b>121 genes (out of the 160 genes above) that were present in the TCGA prostate adenocarcinoma 2016 (PRAD) dataset</b>                                                                                                                                                                                                                                                                                                                                                                                                                                                                                                                                                                                                                                                                                                                                                                                                                                                                                                                                                                                                                                                                                                                                                                                                                                                                                                                       |
| 1: C4orf46; 2: CCNE2; 3: CDH26; 4: CHAC1; 5: FAS; 6: FGD3; 7: FOXN4; 8: FOXQ1; 9: GATA6; 10: GPX8; 11: GUCY1B2; 12: HRK; 13: IER5; 14: KIAA0408; 15: KIAA1462; 16: LIF; 17: C9orf130; 18: MYB; 19: OBFC2A; 20: NOV; 21: PAX1; 22: PDE4D; 23: PDE4DIP; 24: PMP22; 25: RASL11B; 26: C6orf192; 27: SLC7A2; 28: C6orf174; 29: TSPAN12; 30: ACTA2; 31: ADM; 32: JUB; 33: AMIGO3; 34: ANKRD16; 35: ANP32E; 36: ARHGAP32; 37: ARL4D; 38: ASB13; 39: BIRC3; 40: BMF; 41: C10orf10; 42: CBLN2; 43: CBR3; 44: CCNO; 45: CD83; 46: CERK; 47: CLCN5; 48: CNKSR3; 49: DAND5; 50: DNAH11; 51: DSC2; 52: ENC1; 53: EXPH5; 54: F2R; 55: FAM198B; 56: C1orf183; 57: C20orf177; 58: C6orf225; 59: FGD6; 60: FOXD3; 61: FOXO4; 62: FSCN1; 63: GIMAP2; 64: GJB2; 65: AGPAT9; 66: HEG1; 67: HOXA11AS; 68: HOXA7; 69: HOXA9; 70: HOXB5; 71: HOXB6; 72: IFIT2; 73: IFIT5; 74: IFITM1; 75: IRF1; 76: IRX3; 77: IRX5; 78: KCNS3; 79: KIF25; 80: KITLG; 81: KLHL24; 82: KILLIN; 83: LFNG; 84: LPCAT4; 85: LRIG3; 86: LTF; 87: MAP3K8; 88: MEX3B; 89: MNX1; 90: NCOA7; 91: NET1; 92: NEURL3; 93: NIPAL1; 94: NR3C1; 95: C5orf13; 96: NUAK2; 97: OSR2; 98: P2RX7; 99: PABPC5; 100: PAG1; 101: PDLIM3; 102: PGM2L1; 103: PRDM12; 104: PSAT1; 105: RAP2B; 106: RASSF2; 107: RASSF5; 108: RDM1; 109: RNF125; 110: RNF144B; 111: SCGB1D2; 112: SERPINB5; 113: SH3BGRL2; 114: SLC22A10; 115: SMC6; 116: ST8SIA4; 117: TLE1; 118: TNFRSF21; 119: TRIB1; 120: TRIM2; 121: TRIM45 |
